# Supplementary material
Source: Royal Society of Chemistry journal article supplement (doi:10.1039/d5ee07316b)
Supplement: d5ee07316b1.pdf [file d5ee07316b1.pdf]

1  
2  
3  
4  
5  
6  
7  
8  
9  
10  
11

## Supporting Information of

### **Activating the Oxide Pathway Mechanism via Selective Intralayer Cl Coordination with Ni/Fe Sites of Hydroxides for Robust Water Oxidation**

Guanwen Wang<sup>1, 2</sup>, Chunlei Chi<sup>2</sup>, Yufei Zhou<sup>1, 2</sup>, Baoyi Mu<sup>1, 2</sup>, Qiushi Miao<sup>1, 2</sup>, Bin Qi<sup>1, 2</sup>, Xinhou  
Yang<sup>1</sup>, Fan Feng<sup>2</sup>, Liang Wu<sup>1</sup>, Xinxin Zhao<sup>1</sup>, Yichao Huang<sup>\*2</sup>, Chuanqing Wang<sup>\*1</sup>, Tong Wei<sup>\*1, 2</sup>,  
and Zhuangjun Fan<sup>\*1, 2</sup>

<sup>1</sup>Institute of Energy, Hefei Comprehensive National Science Center, Hefei 230051, China

<sup>2</sup>Shandong Key Laboratory of Intelligent Energy Materials, School of Material Science and Engineering,  
China University of Petroleum (East China), Qingdao 266580, China

## 12 **Catalysts preparation**

13 NiFe(OH)<sub>x</sub>Cl<sub>y</sub>@NF was prepared via solvent thermal treatment. Specifically, 0.79  
14 g (3.33 mmol) NiCl<sub>2</sub>·6H<sub>2</sub>O and 1.08 g (6.67 mmol) FeCl<sub>3</sub> were added with a molar ratio  
15 of 1:2 to the solution, which consisted of 80 mL of ethanol and 20 mL of deionized  
16 water. The solution was transferred to a Teflon-lined autoclave and heated for 36 hours  
17 at 200 °C with a pre-treated 5×5 cm<sup>2</sup> NF substrate. The product was washed by  
18 deionized water and dried at 80 °C, exhibiting an average loading of 5.8 mg cm<sup>-2</sup>. The  
19 NiFeO<sub>x</sub>H<sub>y</sub>@NF catalyst was synthesized via a conventional hydrothermal  
20 coprecipitation method. Specifically, 0.87 g of Ni(NO<sub>3</sub>)<sub>2</sub>·6H<sub>2</sub>O, 2.42 g of  
21 Fe(NO<sub>3</sub>)<sub>3</sub>·9H<sub>2</sub>O, and 1.68 g of urea were dissolved in 15 mL of deionized water under  
22 stirring to form a homogeneous precursor solution. The resulting solution was then  
23 transferred into a Teflon-lined autoclave, together with a pretreated 5×5 cm<sup>2</sup> nickel  
24 foam substrate. The hydrothermal reaction was carried out at 150 °C for 24 h. After  
25 naturally cooling to room temperature, the sample was collected, thoroughly rinsed  
26 with deionized water, and then dried at 80 °C to obtain the NiFeO<sub>x</sub>H<sub>y</sub>@NF. The average  
27 loading of NiFeO<sub>x</sub>H<sub>y</sub> on NF was determined to be 2.3 mg cm<sup>-2</sup>. Both of these catalyst  
28 powder (denoted as “NiFe(OH)<sub>x</sub>Cl<sub>y</sub>” and “NiFeO<sub>x</sub>H<sub>y</sub>”) was synthesized in the  
29 corresponding method without the addition of NF. RuO<sub>2</sub>@NF was prepared via a dip-  
30 coating approach. Firstly, 5.0 mg of commercial RuO<sub>2</sub> powder was dispersed in a  
31 mixture of 475 μL deionized water, 475 μL isopropanol, and 50 μL Nafion solution,  
32 followed by ultrasonication for 30 minutes. The suspension was then drop-cast onto the  
33 NF substrate and dried under an infrared lamp. Finally, the electrode was vacuum-dried  
34 at 80 °C for 12 hours to obtain the RuO<sub>2</sub>@NF catalyst.

35

## 36 **Characterizations**

37 The morphology and structure of the samples were characterized by the scanning  
38 electron microscope (SEM, ZEISS, Sigma 360) with an acceleration voltage of 15 kV.  
39 Aberration-corrected scanning transmission electron microscopy (Ac-STEM, Thermo  
40 Fisher, Titan Themis G2 300) with an acceleration voltage of 300 kV. X-ray  
41 photoelectron spectroscopy (XPS) measurements were carried out with a Thermo

42 Fisher Scientific Escalab 250Xi System with monochromatic Al K $\alpha$  radiation (energy  
43 1486.6 eV) calibrated by referencing the C 1s to 284.8 eV. UV-vis spectra were recorded  
44 on a spectrometer (UV-2700, Shimadzu, Japan). EPR spectra were obtained by Bruker  
45 EMXplus-6/1. Ultraviolet photo-electron spectroscopy (UPS) was conducted with a  
46 Thermo Fisher Escalab Xi+ System with He I radiation ( $h\nu=21.22$  eV) under the bias  
47 voltage of -5 V. The energy vs. vacuum energy level ( $E_{vs. vac}$ ) should be calibrated by  
48 the energy vs. RHE ( $E_{vs. RHE}$ ) by the following equation:

$$49 \quad E_{vs. vac} = E_{vs. RHE} + (-4.44 - 0.059 \times \text{pH}) \quad (1)$$

50 Where -4.44 represents the energy gap from RHE (pH=0) to the vacuum energy level<sup>1</sup>.  
51 When pH=14, the gap was calculated to be -5.27 eV. The relationship between  $E_{CBM}$ ,  
52  $E_{VBM}$  and  $E_g$  was summarized:

$$53 \quad E_{VBM} = E_{CBM} - E_g \quad (2)$$

54 Where  $E_{CBM}$  could be detected from the value of flat band potential ( $E_{fb}$ ) in Mott-  
55 Schottky plots.  $E_g$  could be calculated from the Tauc analysis of UV-vis. The  $E_{fermi}$  could  
56 be calculated by the difference value of  $E_{VBM}$  (vs.  $E_{fermi}$ ) from UPS and the calculated  
57  $E_{VBM}$  (vs. vacuum level). FTIR spectroscopy of the samples was performed on a  
58 spectrometer (Shimadzu IRTracer-100). The specific surface area and pore structure  
59 were measured by N<sub>2</sub> adsorption-desorption isotherm at 77.4 K (Quantachrome IQ2).  
60 The surface area was calculated by the Brunauer–Emmett–Teller (BET) method, and  
61 the pore size distribution was derived from the adsorption branches of the isotherm  
62 using the non-local density functional theory (NLDFIT, a carbon model containing  
63 slit/cylindrical pore) model in the Quantachrome ASiQwin software. Inductively  
64 coupled plasma-mass spectrometry (ICP-MS) was conducted by Agilent-7900.

65

## 66 **Chemicals**

67 Nickel chloride hexahydrate (NiCl<sub>2</sub>·6H<sub>2</sub>O, AR), iron chloride (FeCl<sub>3</sub>, AR) and  
68 ruthenium dioxide (RuO<sub>2</sub>, AR), sodium chloride (NaCl, AR) and ethyl alcohol were  
69 purchased from Aladdin Industrial Co., Ltd. Potassium hydroxide (KOH, AR) was  
70 supported by Beijing Chemical Corp. Pt/C catalyst was sourced from Johnson Matthey  
71 Chemicals Co., Ltd. Deionized water (18.2 M $\Omega$ ·cm) was purified through Arium Pro

72 of Sartorius Corp. H<sub>2</sub><sup>18</sup>O (<sup>18</sup>O abundance: 98%) was purchased from Zhengzhou Alfa  
73 Chemical Co., Ltd. Nickel foam (0.15 mm thick) was purchased from Canrd  
74 Technology Co. Ltd. To completely remove the oil and oxide layer, the nickel foam was  
75 ultrasonically pre-treated in 0.1 M HCl, deionized water, and ethanol for 15 minutes,  
76 respectively.

77

## 78 XAS Measurements

79 X-ray absorption spectroscopy data were collected at the BL14W1 station in  
80 Shanghai Synchrotron Radiation Facility (SSRF). The storage ring was working at the  
81 energy of 8.0 GeV with an average electron current of 99.5 mA. The raw data were  
82 processed using the Demeter software package. The spectra were energy-calibrated and  
83 normalized. The energy of the strongest peak of the first-order derivative of X-ray  
84 absorption near edge structure (XANES) is set to E<sub>0</sub>. The extended X-ray absorption  
85 fine structure (EXAFS) was extracted in k-space and Fourier transformed using the k<sup>3</sup>-  
86 weighted EXAFS function to amplify oscillations at high k-values. The detailed fitting  
87 parameters are shown in Tables S3 and S4. The calculation of EXAFS wavelet analysis  
88 was conducted by the FORTRAN program HAMA. The Morlet wavelet was chosen as  
89 the mother wavelet for the basic functions, and the parameters were chosen as  $\sigma=1$ ,  
90  $\kappa=10$ . All EXAFS spectra are presented without phase correction. The *operando* XAS  
91 measurements were conducted in a three-electrode configuration by applying a constant  
92 current density of 20 mA cm<sup>-2</sup> to the catalyst, and XAS spectra were collected at  
93 different time

94

## 95 XAFS Analysis and Results

96 The obtained XAFS data were processed in Athena (version 0.9.26) for  
97 background, pre-edge line and post-edge line calibrations. Then, the Fourier  
98 transformed fitting was carried out in Artemis (version 0.9.26). The k<sup>3</sup>-weighting, k-  
99 range of 3–12.5 Å<sup>-1</sup> and R range of 1–3 Å were used for the fitting of Ni-foil, Fe-foil,  
100 NiFe(OH)<sub>x</sub>Cl<sub>y</sub> and NiFeO<sub>x</sub>H<sub>y</sub>.

101

102 ***Operando* Raman characterization**

103 The Raman spectrometer (Horiba, Labram HR evolution) was utilized to test the  
104 *operando* Raman spectra. The wavelength of the excitation laser was 532 nm from a  
105 He–Ne laser. A Si wafer was used for the calibration of Raman frequencies. In the test  
106 cell, NiFe(OH)<sub>x</sub>Cl<sub>y</sub>@NF acted as the working electrode, a Pt sheet was used as the  
107 counter, and the reversible hydrogen electrode (RHE) reference in 1 M KOH. Potential-  
108 dependent tests were run from OCP to 1.8 V vs. RHE on the CHI660E system.

109

110 ***Operando* ATR-FTIR characterization**

111 The *operando* attenuated total reflectance Fourier transform infrared spectroscopy  
112 (ATR-FTIR, PerkinElmer Spectrum. 3) was carried out by using a three-electrode setup  
113 in 1 M KOH. A total of 5 mg of NiFe(OH)<sub>x</sub>Cl<sub>y</sub> powder was transferred into a centrifuge  
114 tube, followed by the addition of 500 μL ethanol. The mixture was sealed and subjected  
115 to ultrasonication for 1 hour to ensure thorough dispersion. Subsequently, 90 μL of the  
116 suspension was drop-cast onto a silicon crystal substrate and allowed to dry under  
117 ambient conditions. The electrochemical cell was assembled using a Pt sheet as the  
118 counter electrode and the RHE electrode as the reference. KOH solution was then added  
119 as the electrolyte. The spectra were continuously collected until no significant spectral  
120 changes were observed, indicating stabilization. Then, *operando* ATR-FTIR spectra  
121 were recorded over the potential range from OCP to 1.7 V (vs. RHE).

122

123 ***Operando* DEMS characterization**

124 Isotope-labeled DEMS measurements were performed on a QAS 100 device  
125 (Linglu Instruments, Shanghai). RHE and Pt wire were used as the reference electrode  
126 and counter electrode, respectively. The prepared catalyst slurry was drop-cast onto a  
127 gold-coated film using a pipette. The electrolyte consisted of 1 M KOH prepared with  
128 isotopically labeled H<sub>2</sub><sup>18</sup>O (<sup>18</sup>O-labeled water). Before measurements, the system was  
129 allowed to equilibrate for 1 minute to ensure signal stability. For the O<sub>2</sub> isotope labeling  
130 experiment, linear sweep voltammetry (LSV) was conducted in the potential range of  
131 1.0–1.6 V (vs. RHE) at a scan rate of 5 mV s<sup>-1</sup>. The test was repeated for 5 cycles, with

132 a 120-second rest period between each cycle. For the detection of Cl<sub>2</sub>, LSV was  
133 performed under identical conditions with 60 continuous LSV cycles.

134

### 135 **Electrochemical characterizations**

136 Alkaline oxidation was conducted at ambient temperature using a CHI660E  
137 electrochemical workstation, and electrode stability under constant potential was  
138 evaluated with a Solartron 1470E chronoamperometry. A standard three-electrode cell  
139 was employed with NiFe(OH)<sub>x</sub>Cl<sub>y</sub>@NF, NiFeO<sub>x</sub>H<sub>y</sub>@NF and RuO<sub>2</sub>@NF as working  
140 electrodes, a reversible hydrogen electrode (RHE) as reference and a Pt sheet as counter  
141 electrode, where the potential does not need additional correction. The electrolytes—  
142 1 M KOH (pH = 14 ± 0.10) and artificial seawater (1 M KOH + 0.5 M NaCl, pH = 13.9  
143 ± 0.15) were freshly prepared and used within 24 h, respectively. Electrochemical  
144 impedance spectroscopy was performed over 10 kHz to 0.01 Hz with an amplitude of  
145 5 mV at open-circuit voltage. Ohmic drop was compensated using the formula:

$$146 \quad E_{\text{corr}} = E - i \times R_s \times 95\% \quad (3)$$

147 where E is the raw potential, *i* is the current, and *R<sub>s</sub>* is the solution resistance obtained  
148 from the intersection point of the EIS plot with the x-axis. Mott-Schottky curves were  
149 recorded in the mentioned standard three-electrode cell in 1 M KOH.

150

### 151 **ECSA, ECSA-normalized j and mass-normalized j**

152 The specific activity (*j*<sub>ECSA</sub>, mA cm<sup>-2</sup>) is determined by relating it to the ECSA  
153 through the equation:

$$154 \quad \text{ECSA} = A \times C_{\text{dl}} / C_s \quad (4)$$

$$155 \quad j_{\text{ECSA}} = j / \text{ECSA} \quad (5)$$

156 Where A is the geometric area of the catalyst, *C<sub>dl</sub>* is the electrochemical double-layer  
157 capacitance measured via cyclic voltammograms in the non-Faradic range from 0.088  
158 V to 0.098 V vs. RHE, and *C<sub>s</sub>* is the specific capacitance (*C<sub>s</sub>* = 0.06 mF cm<sup>-2</sup>). By  
159 plotting Δ*j*/2 at 0.093 V vs. RHE against scan rates, we estimate *C<sub>dl</sub>* with the linear  
160 fitting slope. The mass of the loaded catalyst (*m*) can be determined by weighing its  
161 mass before and after the NF reaction. The mass-normalized *j* could be calculated

162 according to the following equation:

$$163 \quad j_{\text{mass}} = j / m \quad (6)$$

164

### 165 **Faradaic efficiency measurements**

166 The Faradaic efficiency (FE) for the oxygen evolution reaction (OER) was  
167 quantified via a water-displacement gas collection system. Constant-current electrolysis  
168 was performed at 100 mA using a three-electrode configuration in 1 M KOH electrolyte.  
169 NiFe(OH)<sub>x</sub>Cl<sub>y</sub>@NF and NiFeO<sub>x</sub>H<sub>y</sub>@NF were applied as the working electrode, RHE  
170 as reference and a Pt sheet as counter electrode. Evolved oxygen was collected in an  
171 inverted burette pre-filled with electrolyte, and gas volumes were measured at discrete  
172 time intervals (5, 10, 15, 20, 25, and 30 min). The theoretical oxygen yield was  
173 calculated from the total charge transfer based on Faraday's law:

$$174 \quad n_{\text{O}_2}(\text{theoretical}) = Q / (4 \times F) = I \times t \quad (7)$$

175 where F represents the Faraday constant (96485 C mol<sup>-1</sup>). The FE was determined by  
176 the equation:

$$177 \quad \text{FE} = n_{\text{O}_2}(\text{experimental}) / n_{\text{O}_2}(\text{theoretical}) \times 100\% \quad (8)$$

178 Triplicate measurements were conducted to ensure statistical reliability, with averaged  
179 values reported.

180

### 181 **Theoretical calculation details**

182 All DFT calculations were performed using the CASTEP module in Materials  
183 Studio. The Perdew-Burke-Ernzerhof (PBE) functional within the generalized gradient  
184 approximation (GGA) was employed for exchange-correlation interactions. The  
185 Brillouin zone was sampled by the Monkhorst-Pack grid as  $\Gamma$ -point for all systems with  
186  $2 \times 2 \times 1$  k-points. The geometry optimization convergence criteria are set up as  
187 follows:  $2.0 \times 10^{-6}$  eV for energy, 0.05 eV  $\text{\AA}^{-1}$  for force, 550 eV for cut-off energy, and  
188 0.002  $\text{\AA}$  for displacement. Projected density of states (PDOS) were calculated on  
189 optimized structures, with orbital-projected contributions (Ni-3d, Fe-3d, O-2p, Cl-3p)  
190 extracted for bonding analysis. The d-band centers ( $\epsilon_d$ ) were determined as the first  
191 moment of the Ni/Fe-3d PDOS:

$$\varepsilon_d = \frac{\int_{-\infty}^{+\infty} E \cdot \rho_d(E) dE}{\int_{-\infty}^{+\infty} \rho_d(E) dE} \quad (9)$$

192

193 where  $\langle E \rangle$  denotes the d-orbital-resolved DOS. Crystal orbital Hamilton population  
 194 (COHP) was calculated to quantify bonding/antibonding interactions between Ni/Fe  
 195 and adsorbed hydroxylate atoms using the Dmol<sup>3</sup> program. Double numerical plus  
 196 polarization (DNP) basis set was used with a real-space cutoff of 4.5 Å. Integrated  
 197 COHP (ICOHP) provided bond-strength metrics, with negative/positive values  
 198 indicating bonding/antibonding character. Adsorption energy ( $E$ ) was calculated as:

$$E = E_{\text{total}} - E_{\text{substrate}} - E_{\text{adsorbate}} \quad (10)$$

199

200 Gibbs free energy ( $\Delta G$ ) was computed as:

$$\Delta G = \Delta E + \Delta \text{ZPE} - T\Delta S \quad (11)$$

201

202 Where  $\Delta E$  is the DFT-calculated energy,  $\Delta \text{ZPE}$  is the zero-point energy correction, and  
 203  $T\Delta S$  accounts for entropy.

204

### 205 **Assembly of AEMWE**

206 NiFe(OH)<sub>x</sub>Cl<sub>y</sub>@NF and Pt/C@NF were employed as the anode and cathode, 2 ×  
 207 2 cm<sup>2</sup>, respectively. Pt/C@NF was fabricated by a simple drop-casting method with a  
 208 mass loading of 1.5 mg cm<sup>-2</sup>. The anode and cathode for the electrolytic cell assembly  
 209 were first positioned on their respective flow-field plates, separated using an ion  
 210 exchange membrane (Versegen Tech.), and then an equal compression torque was  
 211 applied. The peristaltic pump supplies 1 M KOH to both the anode and cathode at the  
 212 rate of 60 mL min<sup>-1</sup>. The LSV and EIS of the AEMWE were conducted on Solartron  
 213 1470E. The water electrolysis stability data of the device were recorded on a DC power  
 214 supply (ITECH-6720).

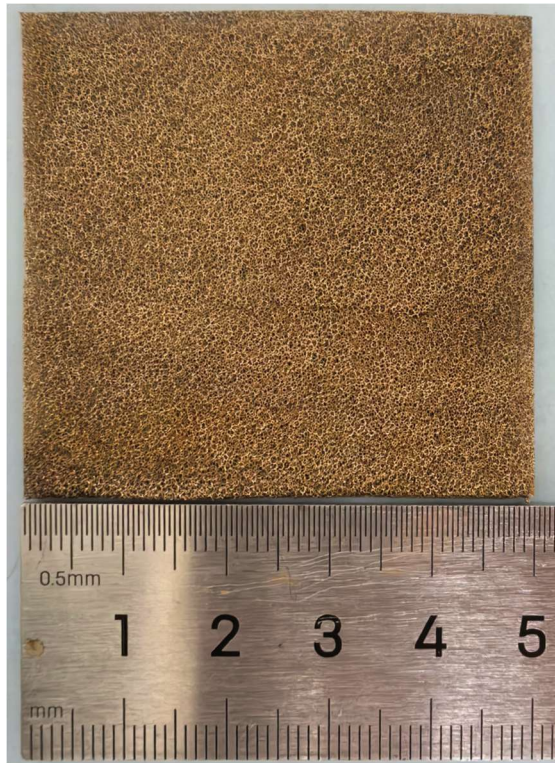

215  
216  
217

**Figure S1.** Digital photo of  $5 \times 5 \text{ cm}^2$   $\text{NiFeO}_x\text{H}_y@NF$ .

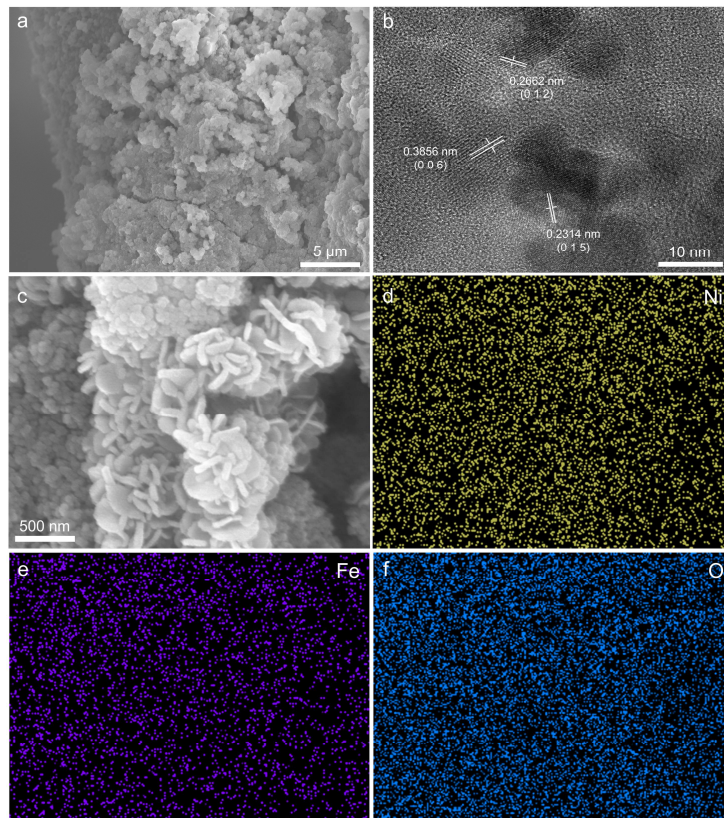

219

220 **Figure S2.** a) SEM image and HRTEM image of b) NiFeO<sub>x</sub>H<sub>y</sub>@NF. c) SEM image and  
221 EDS mapping images of d) Ni, e) Fe and f) O elements for NiFeO<sub>x</sub>H<sub>y</sub>@NF.

222

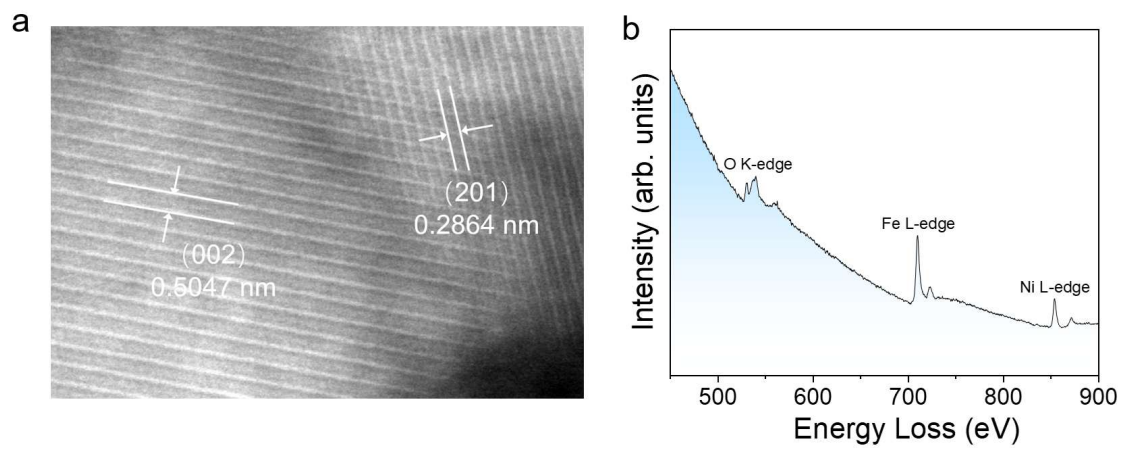

223

224 **Figure S3.** a) Ac-STEM image and b) EELS spectra of O K-edge, Fe L-edge and Ni-L

225 edge for  $\text{NiFe(OH)}_x\text{Cl}_y$  powder.

226

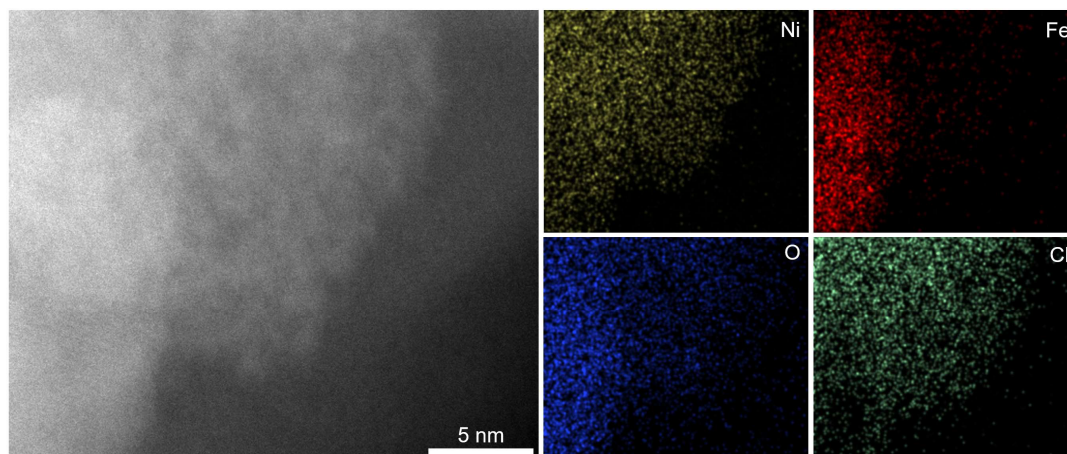

227

228 **Figure S4.** Ac-STEM image and EDS mapping of  $\text{NiFe(OH)}_x\text{Cl}_y$  for Ni, Fe, O, Cl

229 elements.

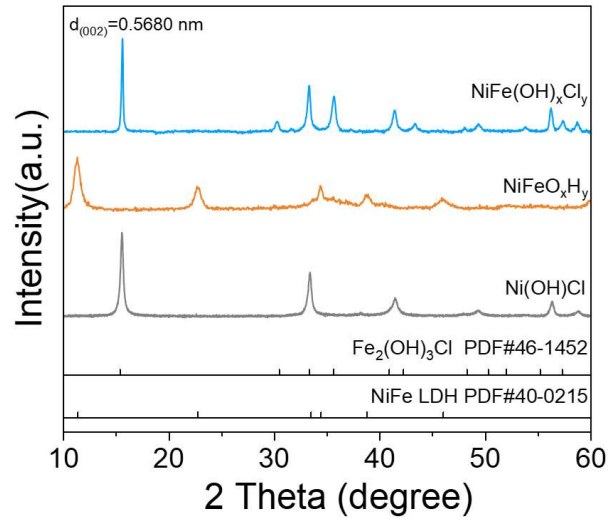

230

231 **Figure S5.** XRD pattern of  $\text{NiFe(OH)}_x\text{Cl}_y$ ,  $\text{NiFeO}_x\text{H}_y$ ,  $\text{Ni(OH)Cl}$  powder and other

232

phases.

233

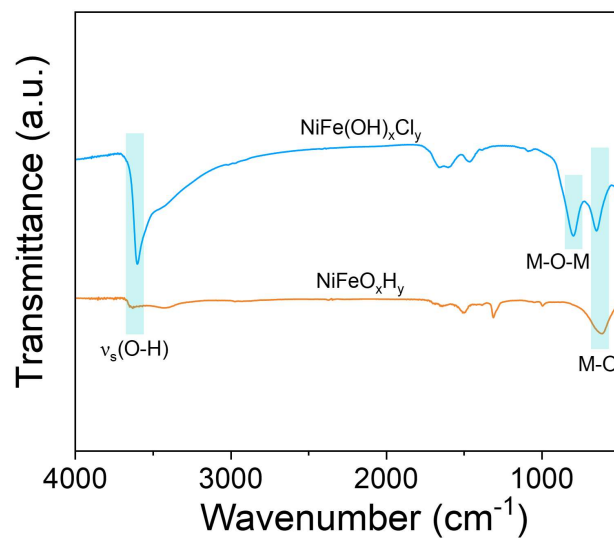

234  
235

**Figure S6.** FTIR spectra of  $\text{NiFe(OH)}_x\text{Cl}_y$  and  $\text{NiFeO}_x\text{H}_y$  powder.

236

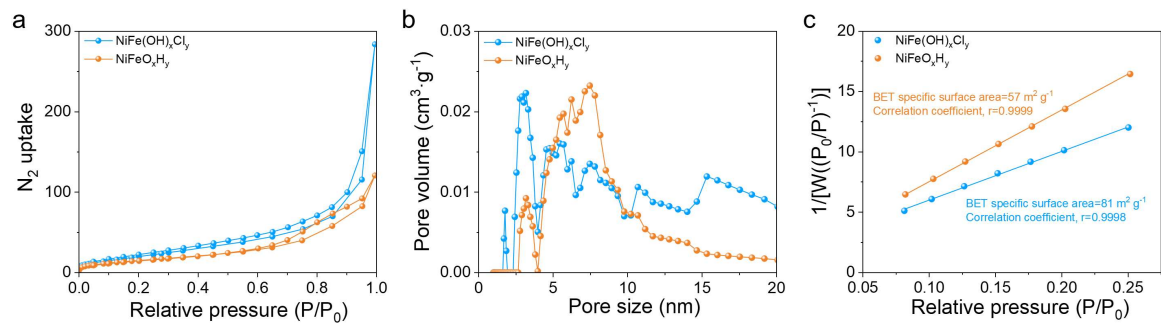

237

238 **Figure S7. a)**  $\text{N}_2$  isothermal absorption and desorption curve, **b)** pore size distribution

239 and **c)** BET surface area calculation of  $\text{NiFe(OH)}_x\text{Cl}_y$  and  $\text{NiFeO}_x\text{H}_y$  powder.

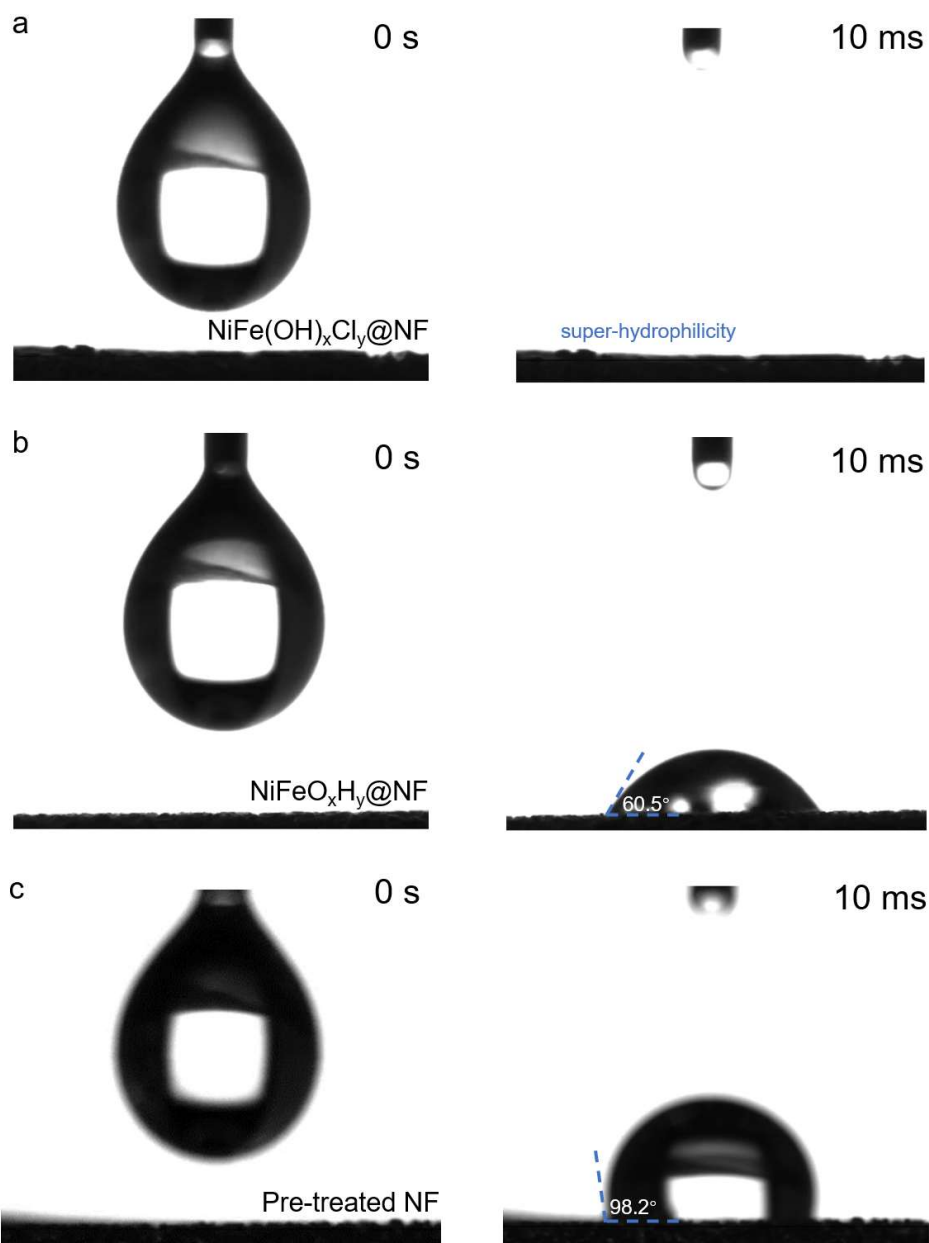

240

241 **Figure S8.** Contact angles of 1M KOH drop on a)  $\text{NiFe(OH)}_x\text{Cl}_y\text{@NF}$ , b)

242  $\text{NiFeO}_x\text{H}_y\text{@NF}$  and c) pre-treated NF.

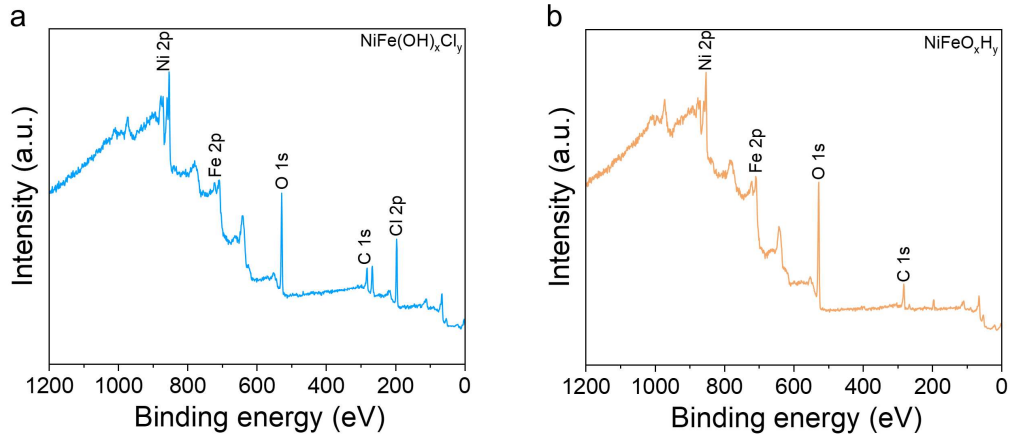

243

244

**Figure S9.** XPS surveys of a)  $\text{NiFe(OH)}_x\text{Cl}_y$  and b)  $\text{NiFeO}_x\text{H}_y$ .

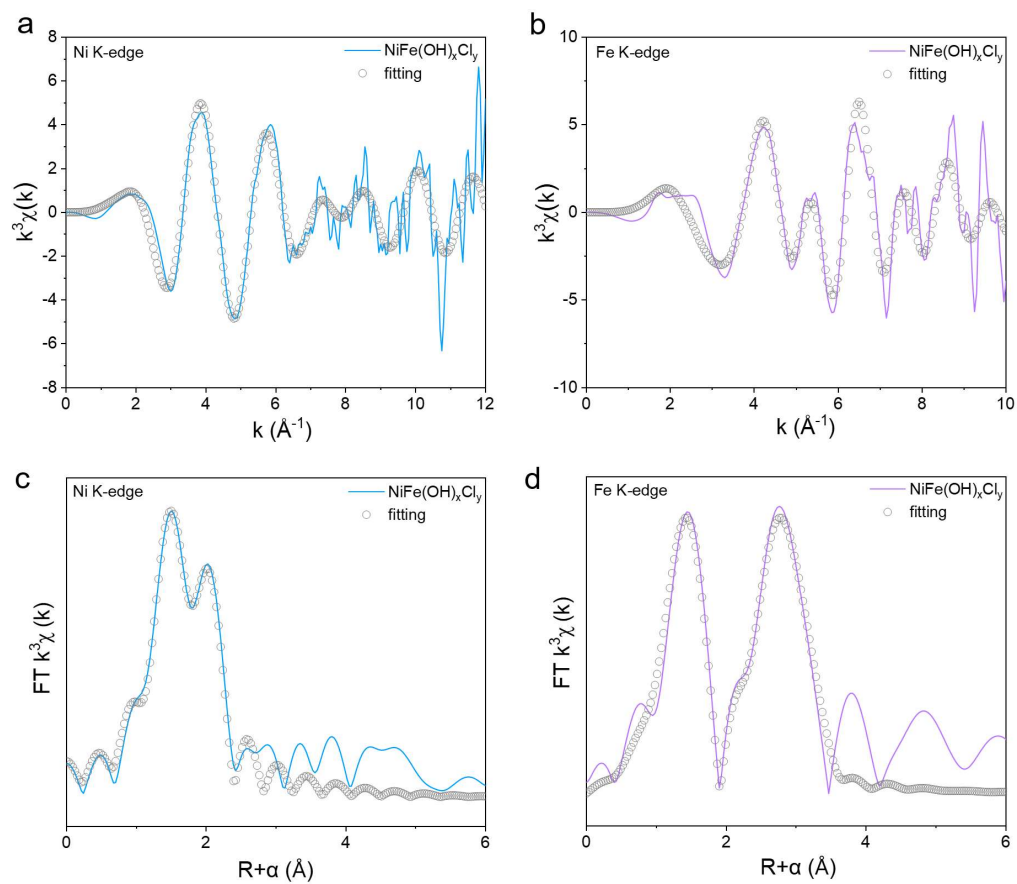

245

246 **Figure S10.**  $k^3$ -weighted  $\chi(k)$  function oscillation and fitting curves of a) Ni K-edge

247 and b) Fe K-edge for NiFe(OH)<sub>x</sub>Cl<sub>y</sub>.  $k^3$ -weighted  $\chi(k)$  function of c) Ni K-edge and d)

248 Fe K-edge EXAFS spectra and fitting curves in the R space of NiFe(OH)<sub>x</sub>Cl<sub>y</sub>.

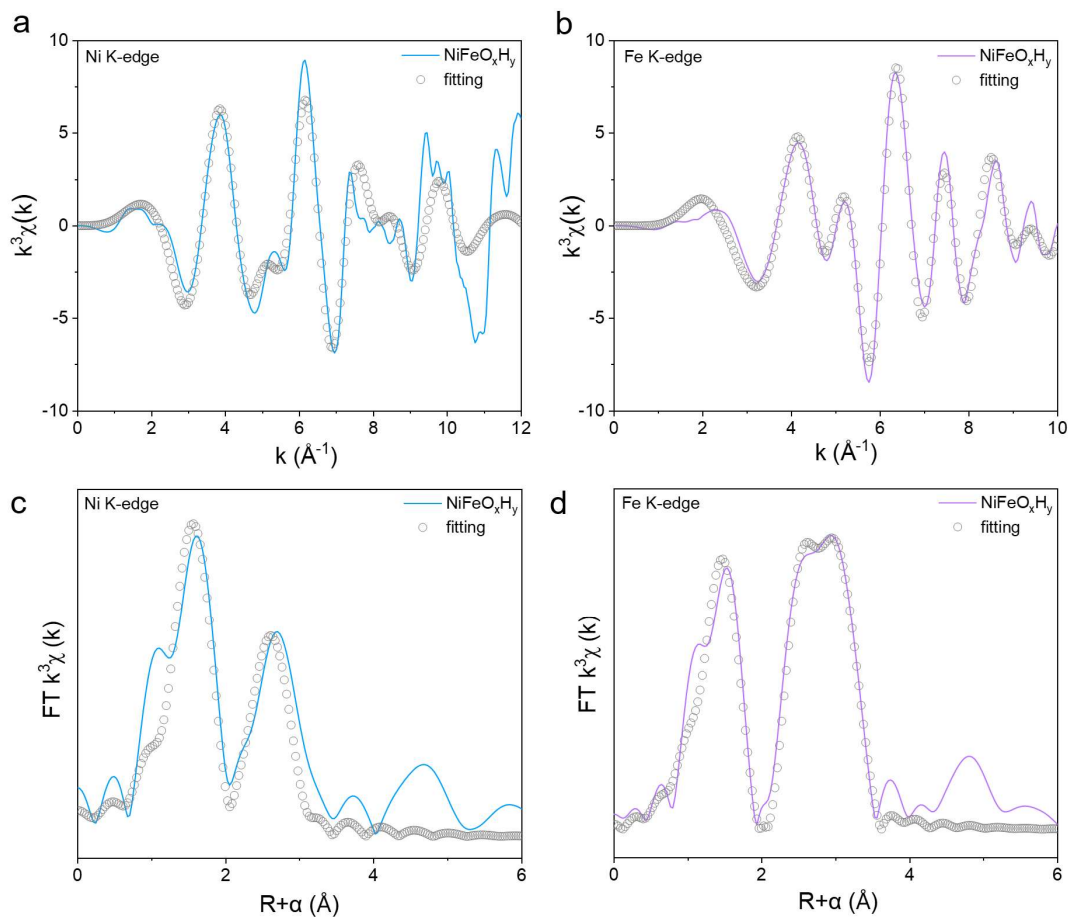

249

250 **Figure S11.**  $K^3$ -weighted  $\chi(k)$  function oscillation and fitting curves of a) Ni K-edge

251 and b) Fe K-edge for NiFeO<sub>x</sub>H<sub>y</sub>.  $K^3$ -weighted  $\chi(k)$  function of c) Ni K-edge and d) Fe

252 K-edge EXAFS spectra and fitting curves in the R space of NiFeO<sub>x</sub>H<sub>y</sub>.

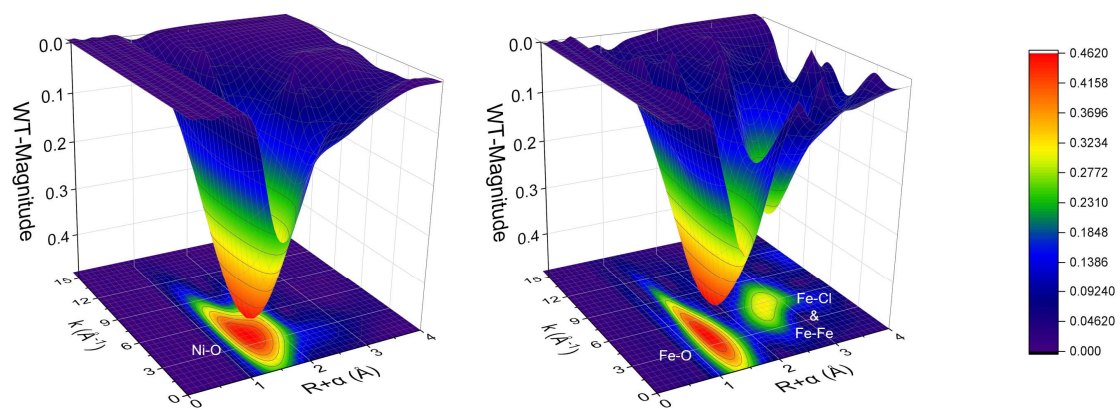

253

254 **Figure S12.** a) Ni-K edge and b) Fe K-edge WT-EXAFS spectra of  $\text{NiFe(OH)}_x\text{Cl}_y$ .

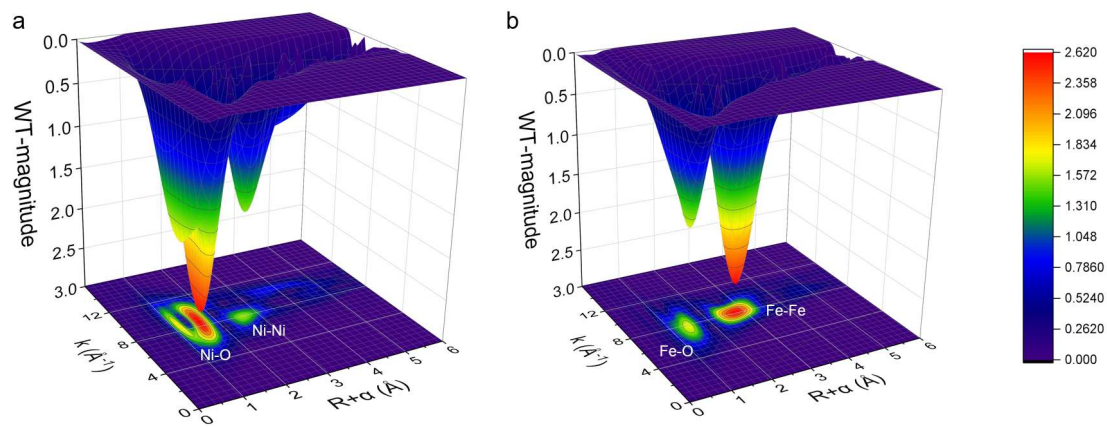

255

256 **Figure S13.** a) Ni-K edge and b) Fe K-edge WT-EXAFS spectra of  $\text{NiFeO}_x\text{H}_y$ .

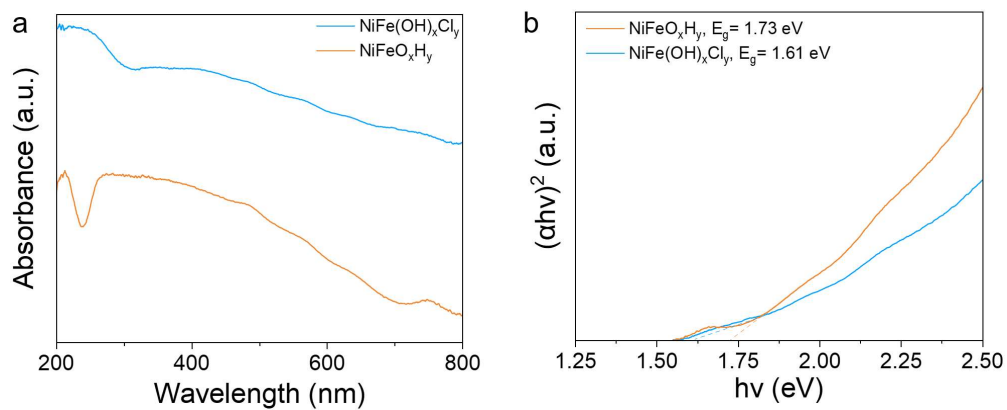

257

258 **Figure S14.** a) UV-Vis DRS spectra of  $\text{NiFe(OH)}_x\text{Cl}_y$  and  $\text{NiFeO}_x\text{H}_y$ . b) Tauc analyses

259 of  $\text{NiFe(OH)}_x\text{Cl}_y$  and  $\text{NiFeO}_x\text{H}_y$ .

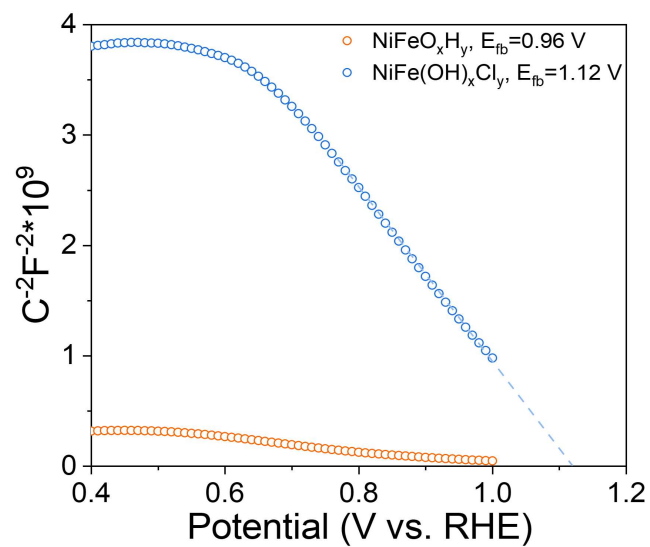

260  
261

**Figure S15.** Mott-Schottky plots of  $NiFe(OH)_xCl_y$  and  $NiFeO_xH_y$ .

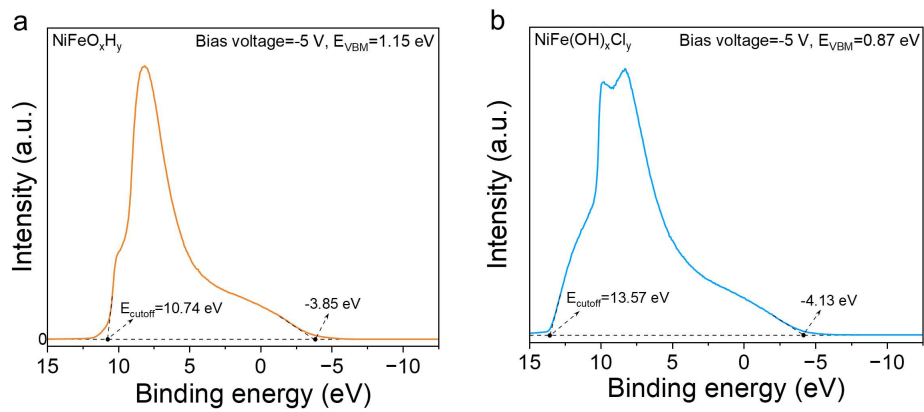

262

263

**Figure S16.** UPS spectra of a)  $\text{NiFeO}_x\text{H}_y$  and b)  $\text{NiFe(OH)}_x\text{Cl}_z$ .

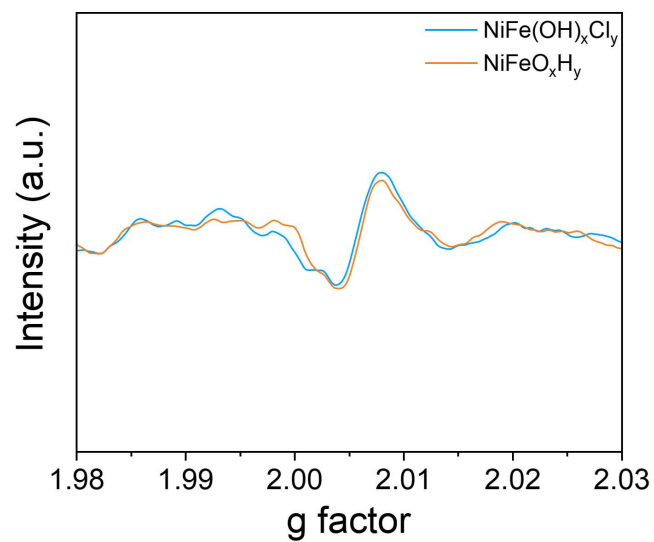

264  
265  
266

**Figure S17.** EPR spectra of  $\text{NiFe(OH)}_x\text{Cl}_y$  and  $\text{NiFeO}_x\text{H}_y$ .

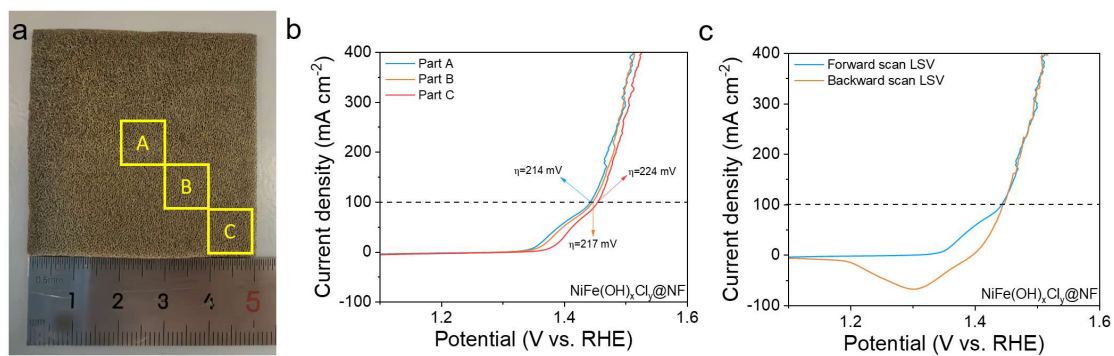

267

268 **Figure S18.** a) Schematic illustration of three different parts for the uniformity test. b)

269 LSV curves of parts A, B and C with 95% iR compensation. c) Forward and backward

270 scan LSV curves of NiFe(OH)<sub>x</sub>Cl<sub>y</sub>@NF with 95% iR compensation

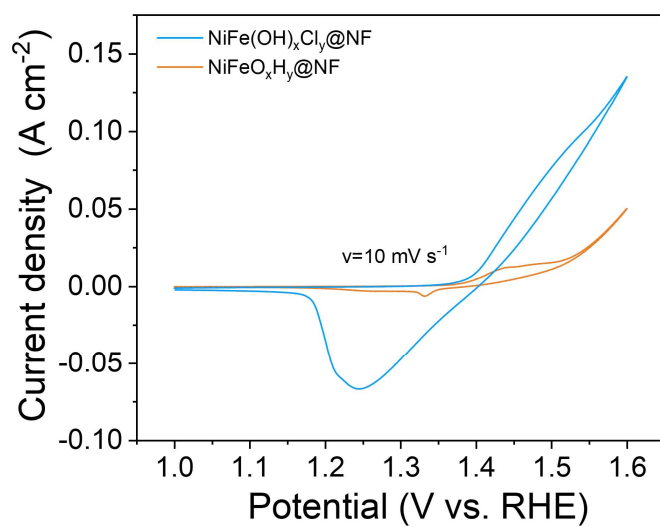

271

272

**Figure S19.** CV comparison of NiFe(OH)<sub>x</sub>Cl<sub>y</sub>@NF and NiFeO<sub>x</sub>H<sub>y</sub>@NF.

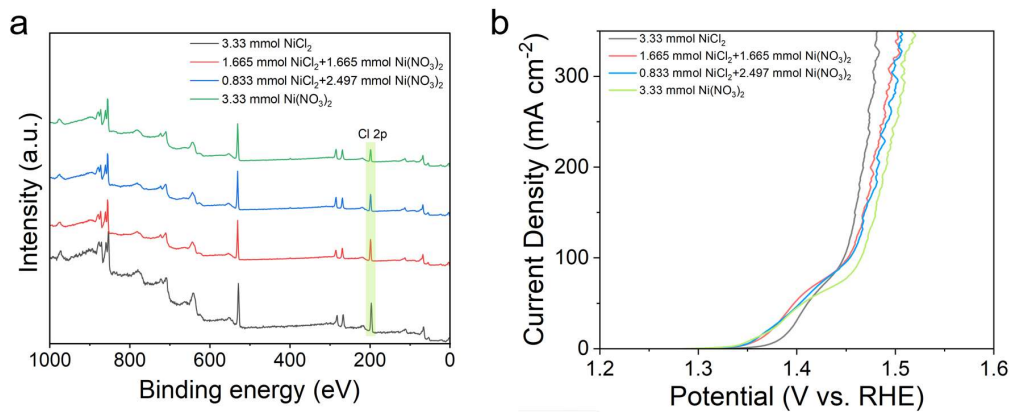

273

274 **Figure S20.** a) XPS survey of  $\text{NiFe(OH)}_x\text{Cl}_y$  powder with different constitutions of Ni

275 salt. b) LSV curves of  $\text{NiFe(OH)}_x\text{Cl}_y@NF$  with different Cl content.

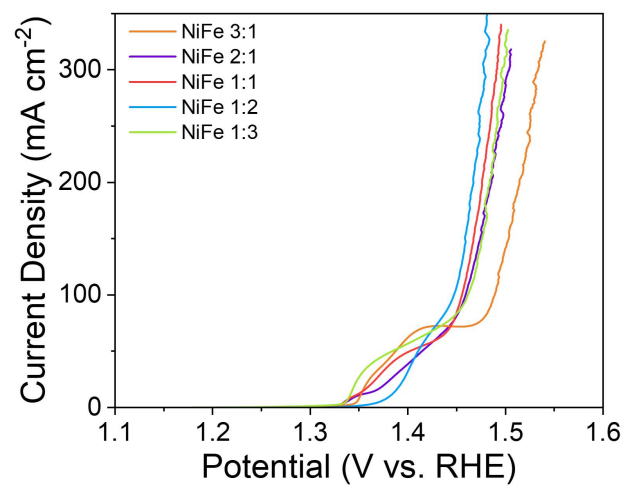

276

277

**Figure S21.** LSV curves of NiFe(OH)<sub>x</sub>Cl<sub>y</sub>@NF with different Ni/Fe ratio.

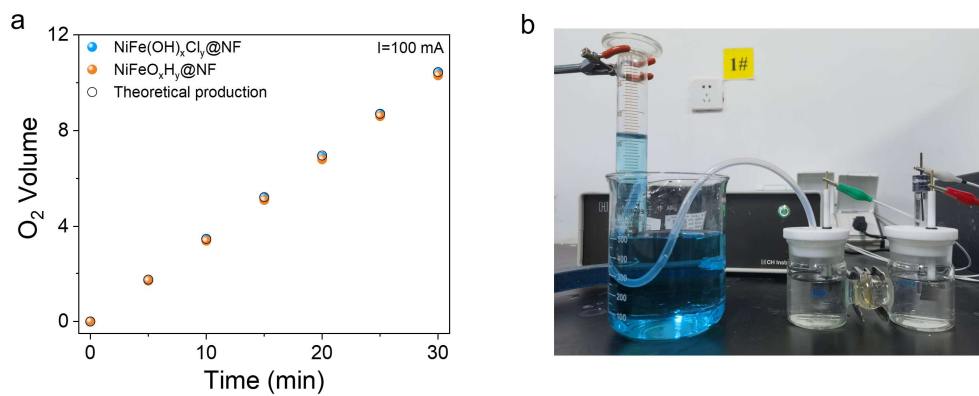

278

279 **Figure S22.** a) Faraday efficiency calculation of NiFe(OH)<sub>x</sub>Cl<sub>z</sub>@NF and

280 NiFeO<sub>x</sub>H<sub>y</sub>@NF. b) Photo of the oxygen evolution test using the drainage method.

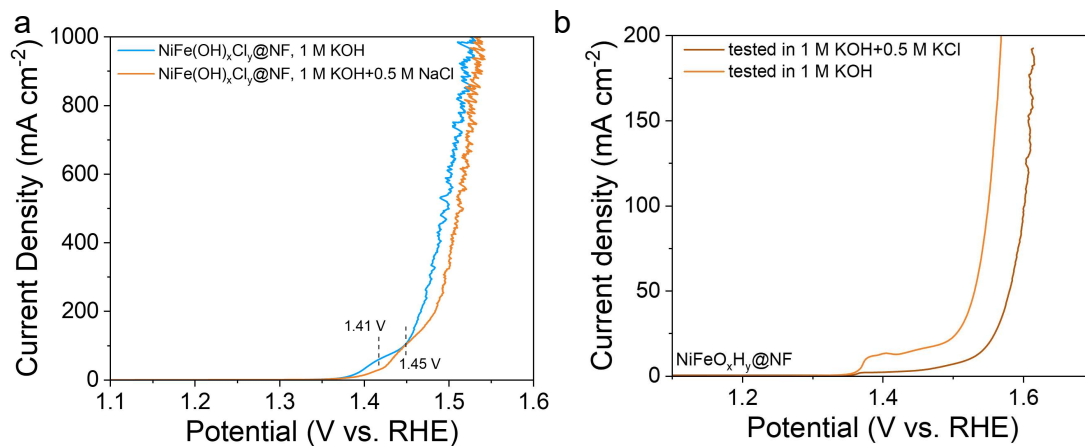

281

282 **Figure S23.** a) LSV curves of NiFe(OH)<sub>x</sub>Cl<sub>z</sub>@NF in 1 M KOH and artificial seawater  
 283 (1 M KOH+0.5 M NaCl). b) LSV curves of NiFeO<sub>x</sub>H<sub>y</sub>@NF in 1 M KOH and 1 M  
 284 KOH+0.5 M KCl.

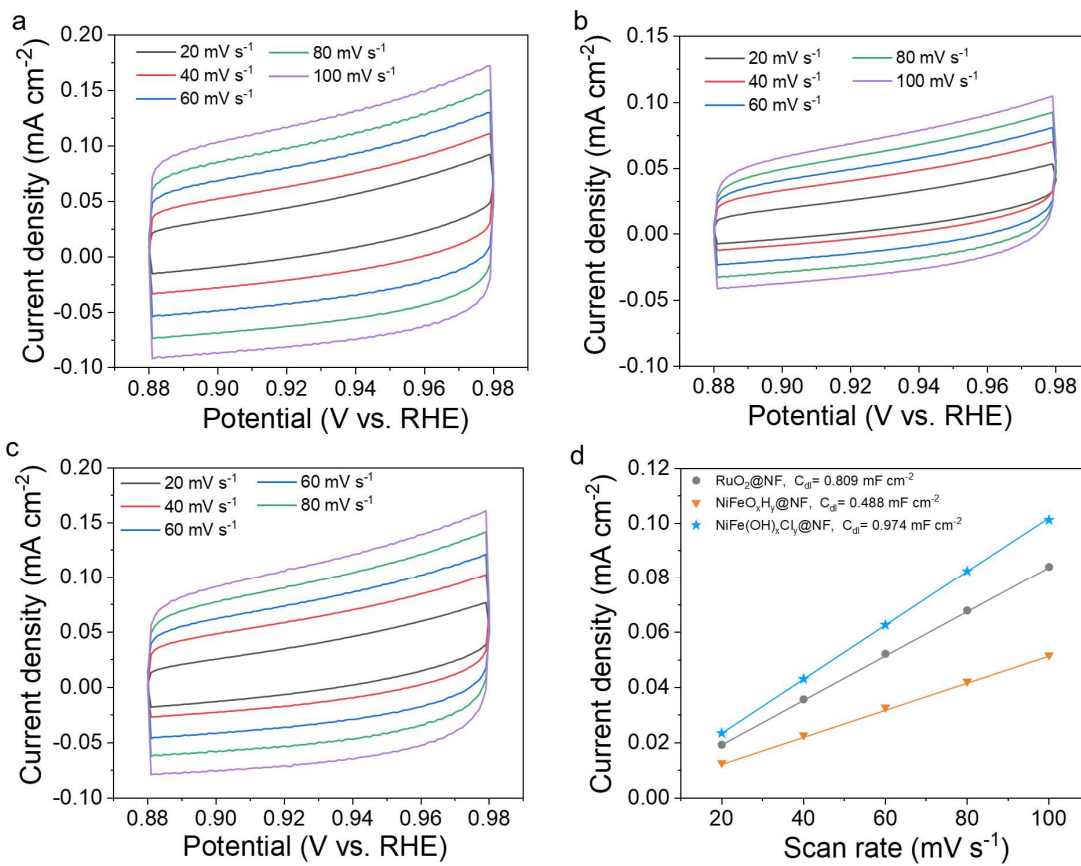

285

286 **Figure S24.** CV curves of a) NiFe(OH)<sub>x</sub>Cl<sub>y</sub>@NF, b) NiFeO<sub>x</sub>H<sub>y</sub>@NF and c) RuO<sub>2</sub>@NF  
 287 under non-Faradaic potential range. d) C<sub>dl</sub> curves of NiFe(OH)<sub>x</sub>Cl<sub>y</sub>@NF,  
 288 NiFeO<sub>x</sub>H<sub>y</sub>@NF and RuO<sub>2</sub>@NF.

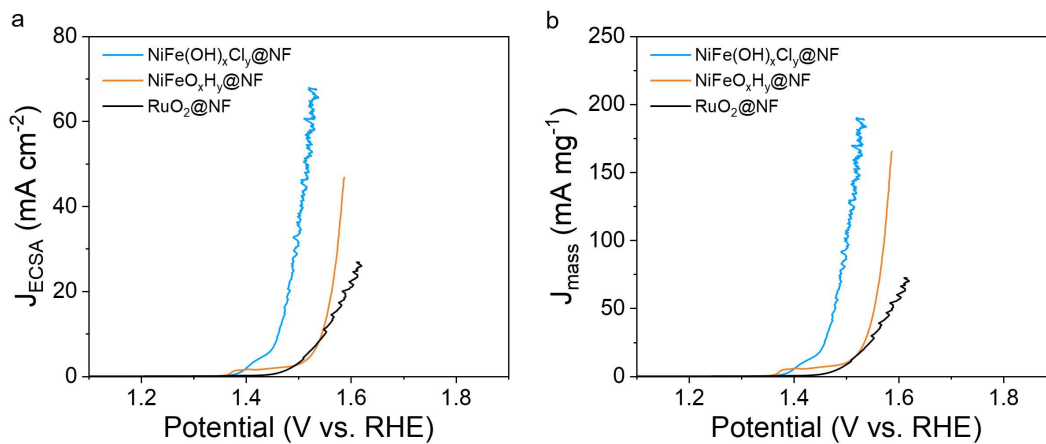

289

290 **Figure S25.** a) ECSA-normalized LSV curves and b) mass-normalized LSV curves of

291 NiFe(OH)<sub>x</sub>Cl<sub>y</sub>@NF, NiFeO<sub>x</sub>H<sub>y</sub>@NF and RuO<sub>2</sub>@NF.

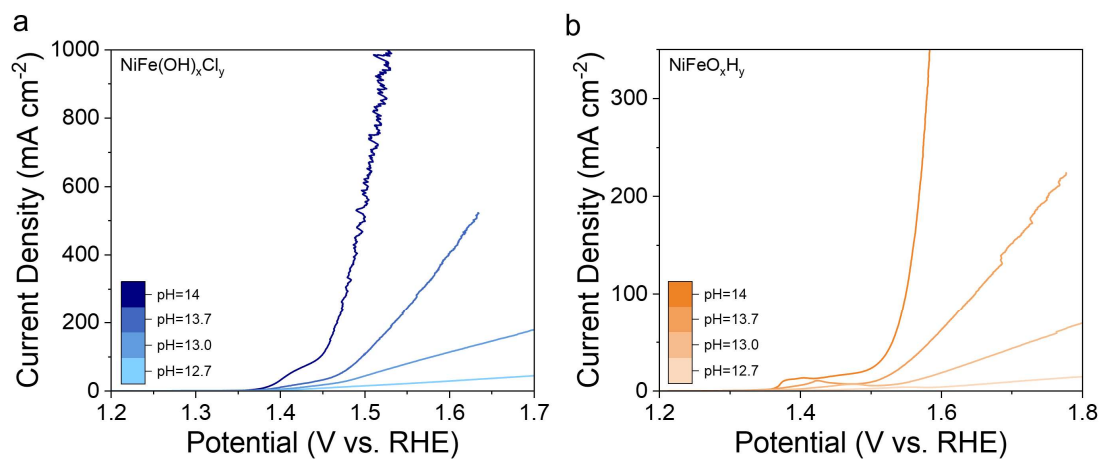

292

293 **Figure S26.** LSV curves of  $\text{NiFe(OH)}_x\text{Cl}_y$ @NF and  $\text{NiFeO}_x\text{H}_y$ @NF in

294 KOH electrolyte with different pH.

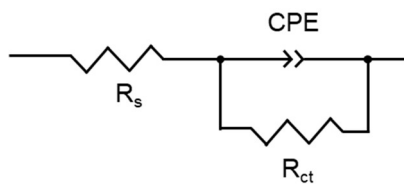

295

296 **Figure S27.** Fitting equivalent circuits of  $\text{NiFe}(\text{OH})_x\text{Cl}_y@\text{NF}$  and  $\text{NiFeO}_x\text{H}_y@\text{NF}$ .

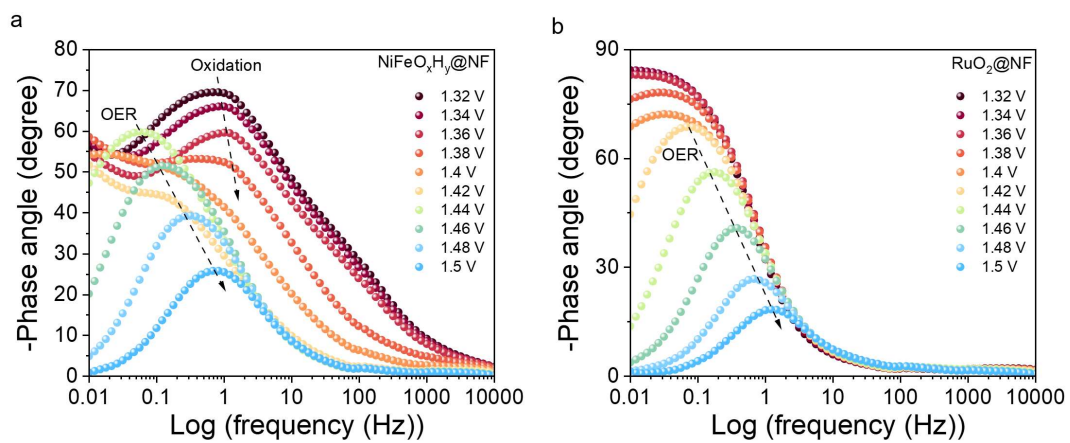

297

298

**Figure S28.** In-situ Bode plots of **a** NiFeO<sub>x</sub>H<sub>y</sub>@NF and **b** RuO<sub>2</sub>@NF.

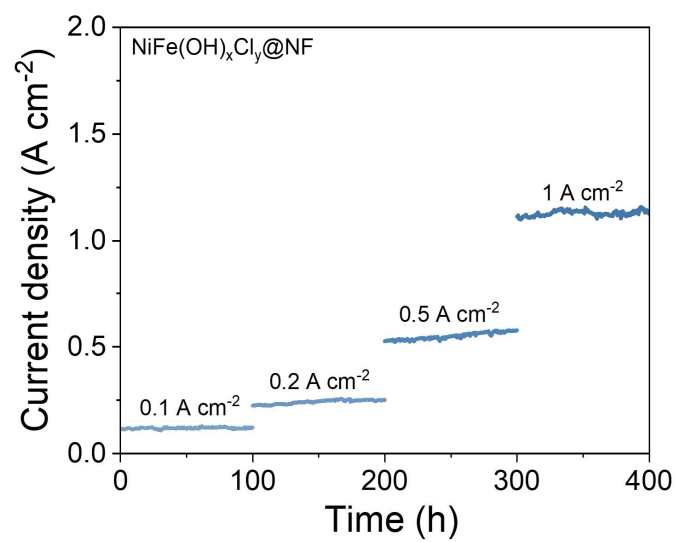

299

300 **Figure S29.** Step constant current test of NiFe(OH)<sub>x</sub>Cl<sub>y</sub>@NF at various current  
301 densities.

302

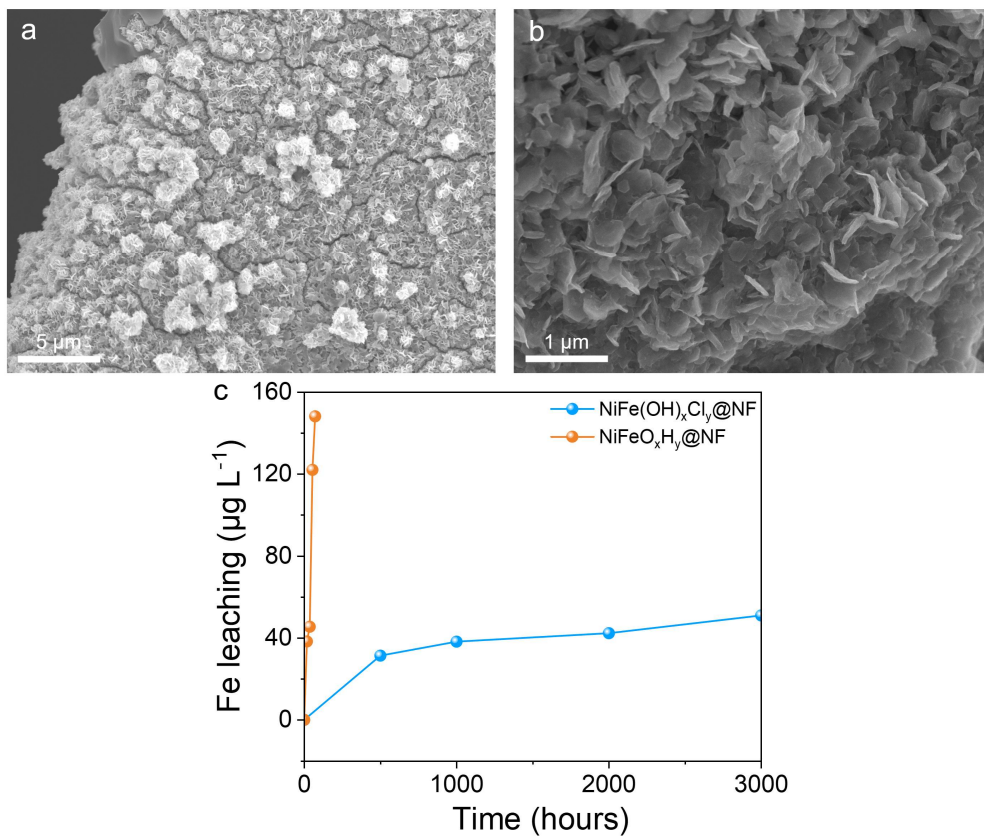

303

304 **Figure S30.** a-b) SEM images of NiFe(OH)<sub>x</sub>Cl<sub>y</sub>@NF after 3000 h i-t test. c) ICP-MS

305 results of Fe content in the electrolyte of NiFe(OH)<sub>x</sub>Cl<sub>y</sub>@NF and NiFeO<sub>x</sub>H<sub>y</sub>@NF.

306

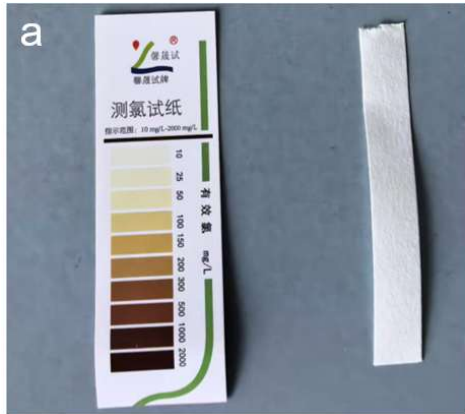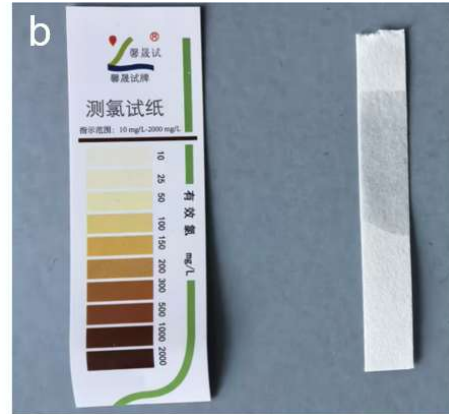

307

308 **Figure S31.** Chlorine test strips a) before and b) after dropping the tested electrolyte.

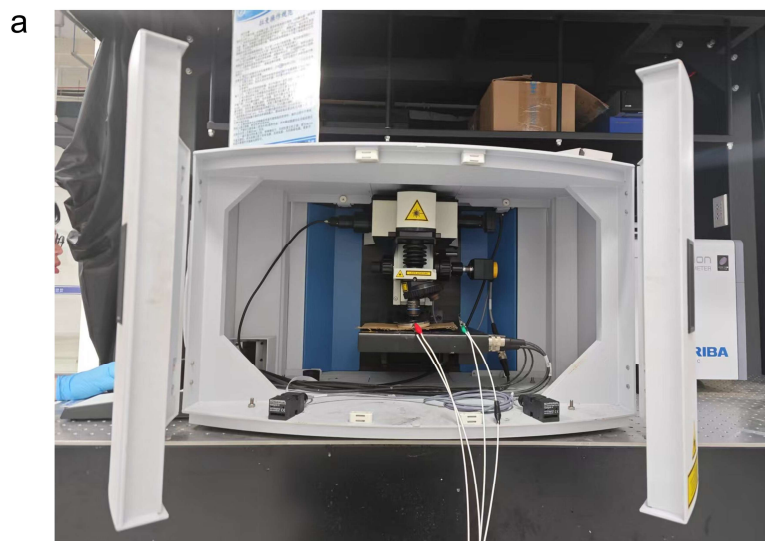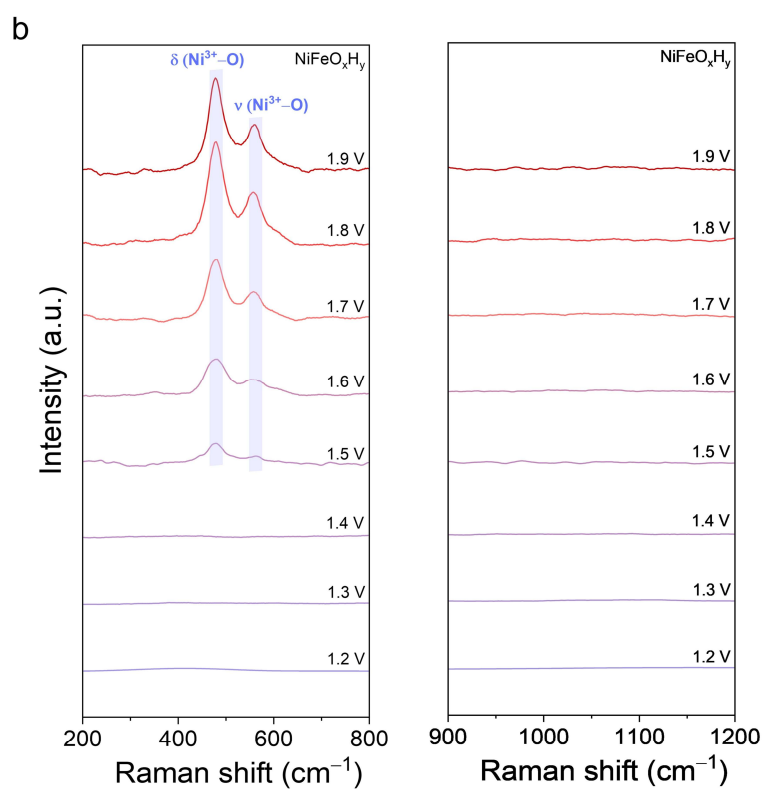

309

310 **Figure S32.** a) Picture of *Operando* Raman test. b) *Operando* Raman spectra of  
 311  $\text{NiFeO}_x\text{H}_y$ .

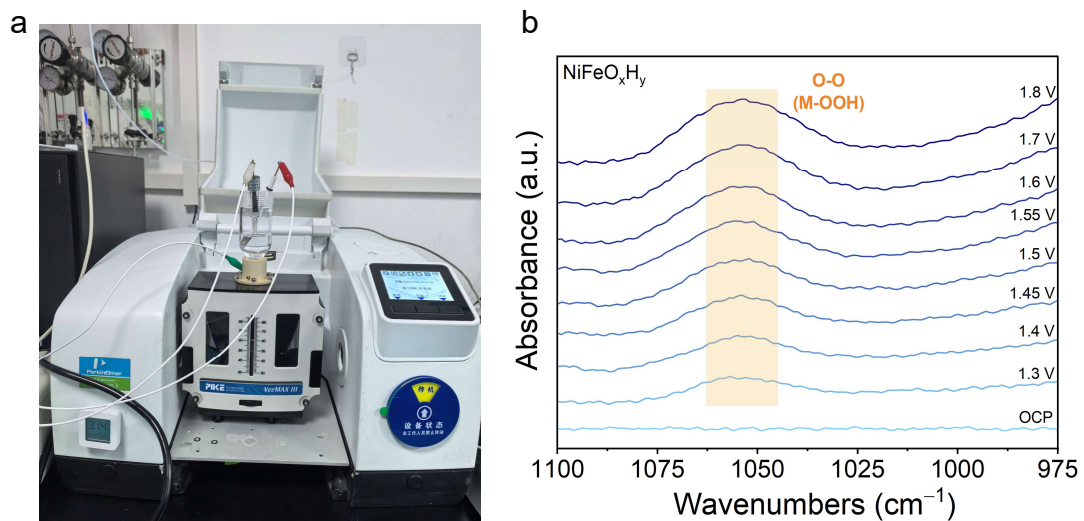

312

313 **Figure S33.** a) Picture of *Operando* ATR-FTIR test. b) *Operando* ATR-FTIR spectra

314

of NiFeO<sub>x</sub>H<sub>y</sub>.

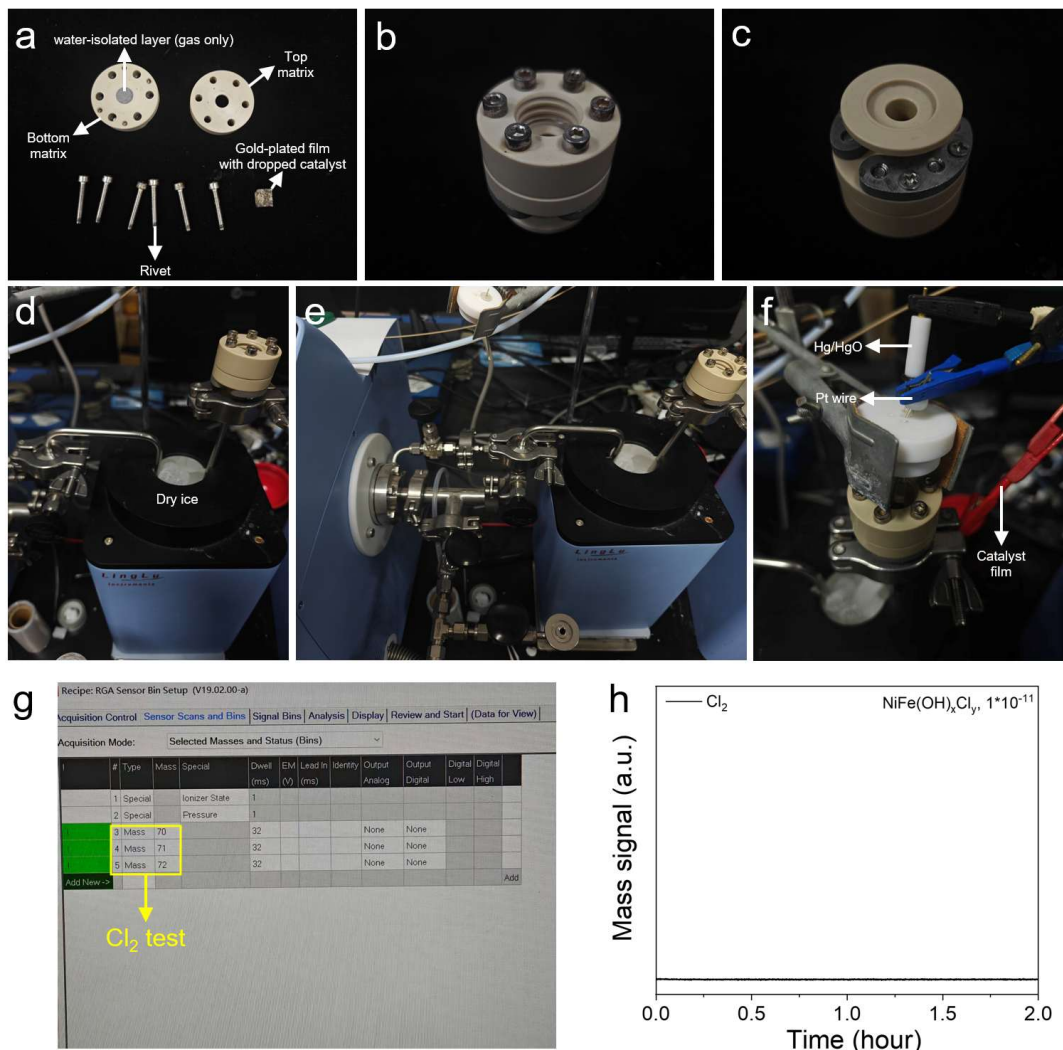

315

316 **Figure S34.** a) Schematic picture of the individual components of the DEMS cell. b)  
 317 Top matrix and c) bottom matrix of the DEMS cell. d) Schematic picture of dry-ice  
 318 condensation. e) Schematic diagram of the connection between the *operando*  
 319 electrochemical setup and the mass spectrometer. f) Three-electrode *operando*  
 320 electrochemical setup. g) Parameter settings for the detection of target gas molecular  
 321 masses (m/z channels). h) *Operando* DEMS  $\text{Cl}_2$  signals measurement during LSV  
 322 process of  $\text{NiFe(OH)}_x\text{Cl}_\gamma$ .

323 As shown in Figure S31a, the DEMS cell consists of an upper and a lower module.  
 324 The lower module contains a hydrophobic water-separation membrane, which blocks  
 325 liquid permeation while allowing the evolved gases to pass through. The two modules  
 326 are fastened by multiple rivets, and a catalyst-coated gold-plated membrane is  
 327 sandwiched between them. Figure S34b and Figure S34c show the upper and lower

328 modules of the cell, respectively. The gases generated during OER were directed to a  
329 dry-ice trap for condensation and separation; during analysis, the condensates were re-  
330 vaporized and introduced into the mass spectrometer for detection (Figure S34d–e).  
331 The OER was conducted in a three-electrode configuration, using Hg/HgO as the  
332 reference electrode, a Pt wire as the counter electrode, and the catalyst-loaded gold-  
333 plated membrane as the working electrode (Figure S34f). Before gas collection, the  
334 target mass-to-charge ( $m/z$ ) channels were preset (e.g.,  $m/z=70$ , 71, and 72 for  $\text{Cl}_2$ ,  
335 Figure S34g). Notably, for chlorine detection, continuous cyclic scans were performed  
336 between 0.076 and 0.676 V (1.0–1.6 V vs RHE) at  $5 \text{ mV s}^{-1}$  for 60 cycles (120 min),  
337 and the  $\text{Cl}_2$  evolution signal was monitored throughout the entire process.

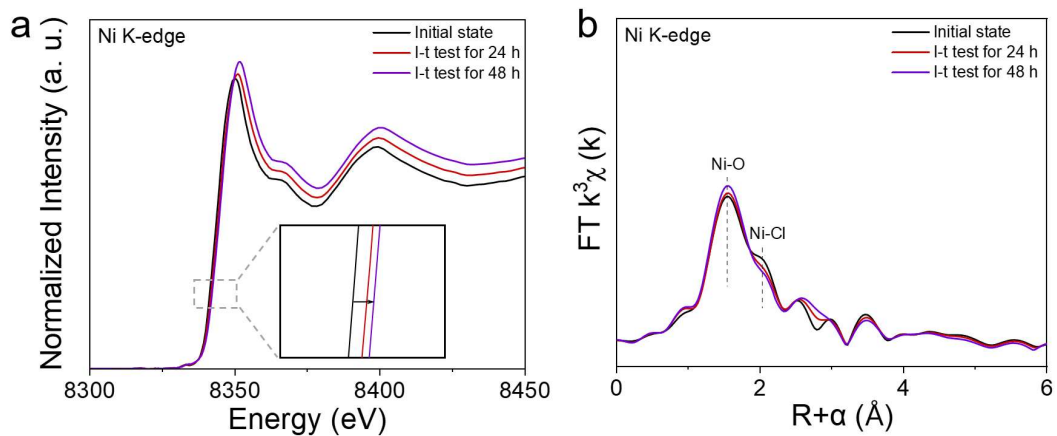

338

339 **Figure S35.** a) Ni K-edge in situ XANES spectra of  $\text{NiFe}(\text{OH})_x\text{Cl}_y$ . b)  $k^3$ -weighted  $\chi$

340 (k) function of Ni K-edge in situ EXAFS spectra in the R space.

341

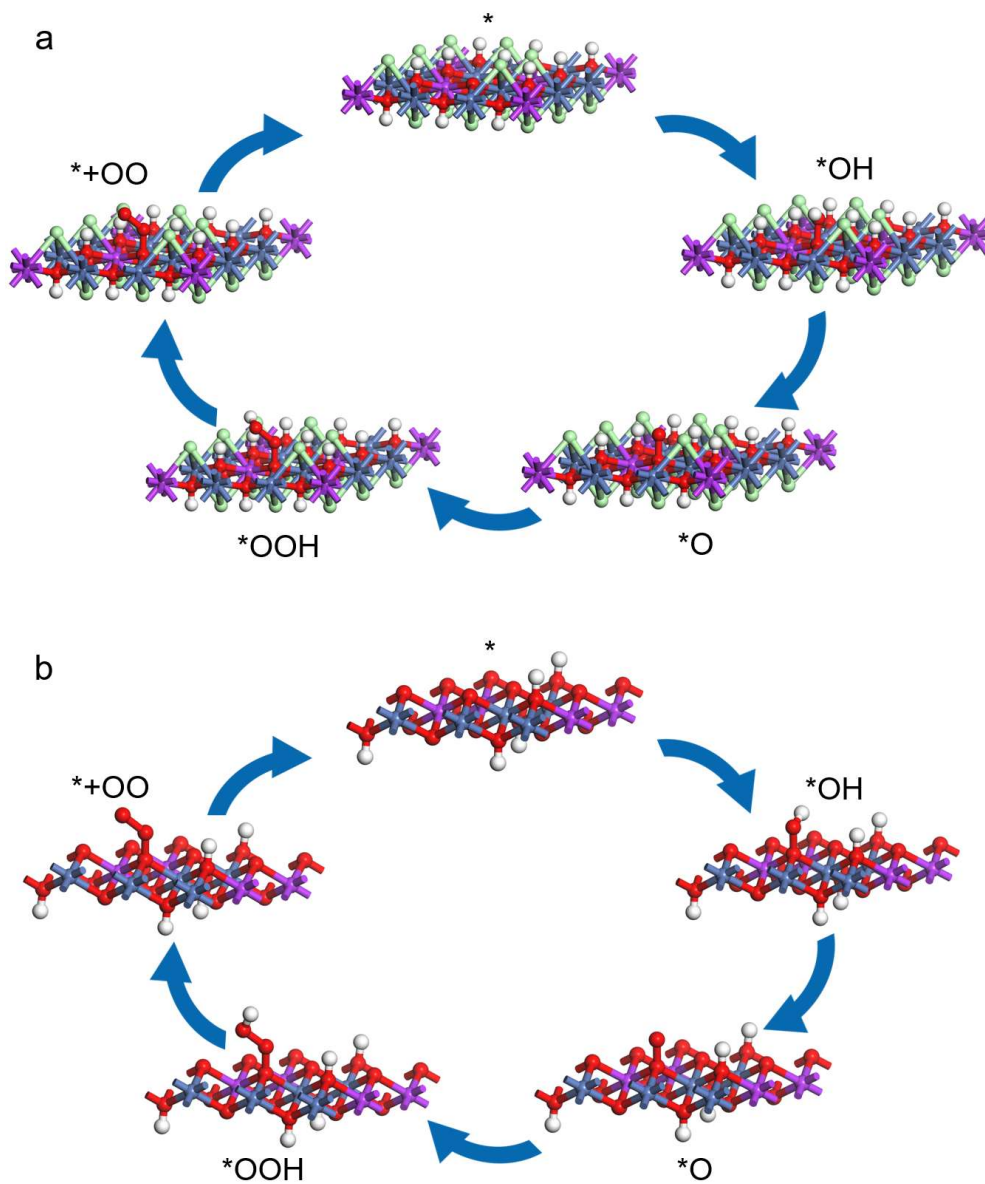

342

343 **Figure S36.** Calculation models of a  $\text{NiFe}(\text{OH})_x\text{Cl}_y$  and b  $\text{NiFeO}_x\text{H}_y$  in AEM pathway.

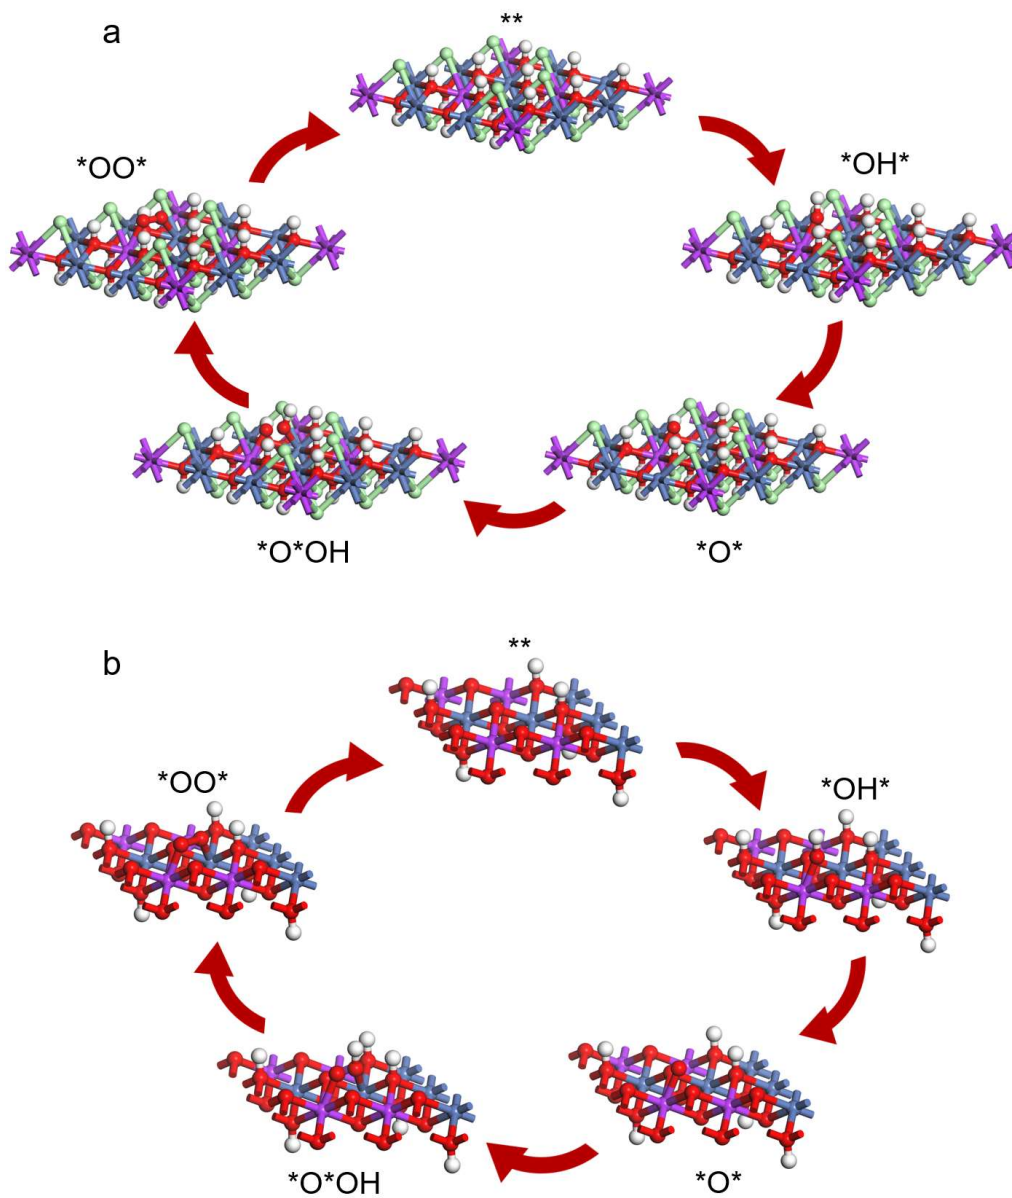

344

345 **Figure S37.** Calculation models of a  $\text{NiFe(OH)}_x\text{Cl}_y$  and b  $\text{NiFeO}_x\text{H}_y$  in OPM pathway.

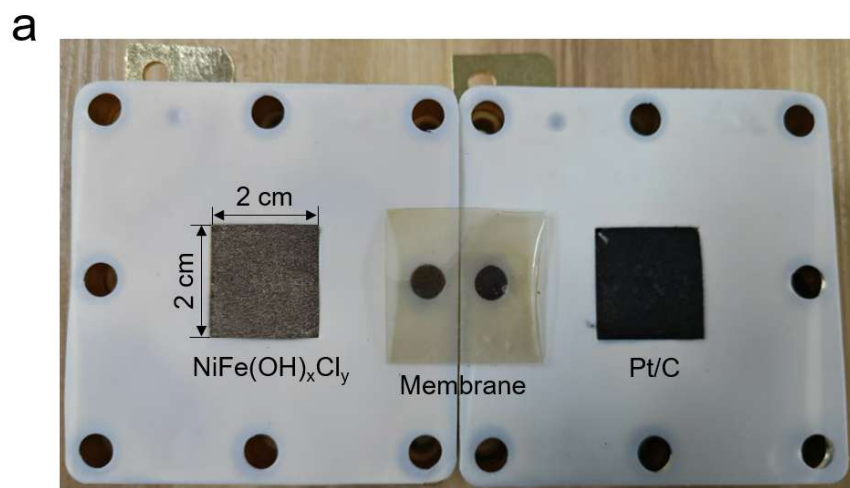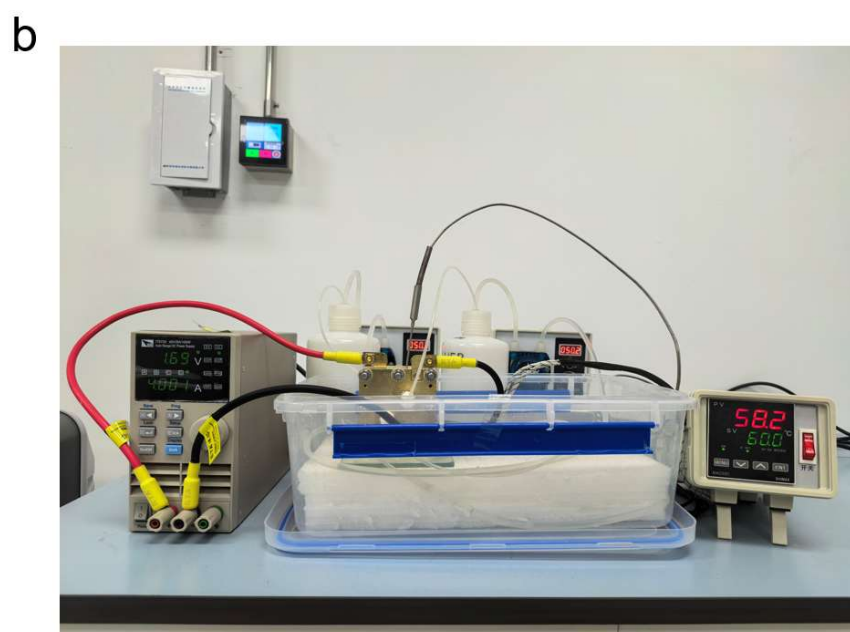

346

347 **Figure S38.** a) Compositions of NiFe(OH)<sub>x</sub>Cl<sub>y</sub>|Pt/C AEMWE. b) Assembled  
348 NiFe(OH)<sub>x</sub>Cl<sub>y</sub>|Pt/C AEMWE (2×2 cm<sup>2</sup>) tested at 1 A cm<sup>-2</sup>, 1.69 V.

349

350 **Notes:** The energy efficiency of the AEMWE was evaluated based on the ratio between  
351 the thermoneutral voltage and the actual operating voltage. The thermoneutral voltage  
352 of water electrolysis under standard conditions is considered to be 1.48 V, which  
353 accounts for both the Gibbs free energy and the enthalpy change (i.e., the total energy  
354 input required to produce H<sub>2</sub> and O<sub>2</sub> without heat exchange). Accordingly, the voltage  
355 efficiency ( $\eta$ ) was calculated as:

356

$$\eta = 1.48 / U_{\text{cell}} \quad (1)$$

357 where  $U_{\text{cell}}$  is the actual operating voltage of the electrolyzer. The theoretical electric  
358 charge required to produce 1 kg of hydrogen was calculated based on Faraday's law  
359 and the molecular weight of hydrogen gas. The molar mass of  $\text{H}_2$  is  $2.016 \text{ g mol}^{-1}$ , thus  
360 1 kg of  $\text{H}_2$  corresponds to:

$$361 \quad n_{\text{H}_2} = 1000 / 2.016 = 496 \text{ mol} \quad (2)$$

362 The total charge required for producing 496 mol of  $\text{H}_2$  is:

$$363 \quad Q = 2 \times 96485 \times 496 = 9.57 \times 10^7 \text{ C} \quad (3)$$

364 The corresponding electrical energy input is calculated as:

$$365 \quad E = Q \times U_{\text{cell}} / 3600 \times 1000 \text{ (kWh)} \quad (4)$$

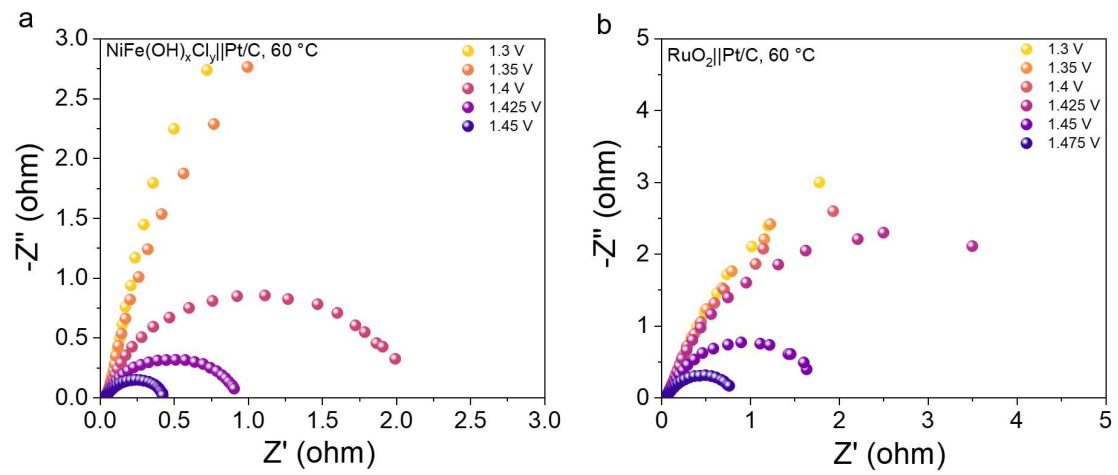

366

367 **Figure S39.** In-situ EIS plots of a)  $\text{NiFe(OH)}_x\text{Cl}_y\text{Pt/C}$  and b)  $\text{NiFeO}_x\text{H}_y\text{Pt/C}$  at 60 °C.

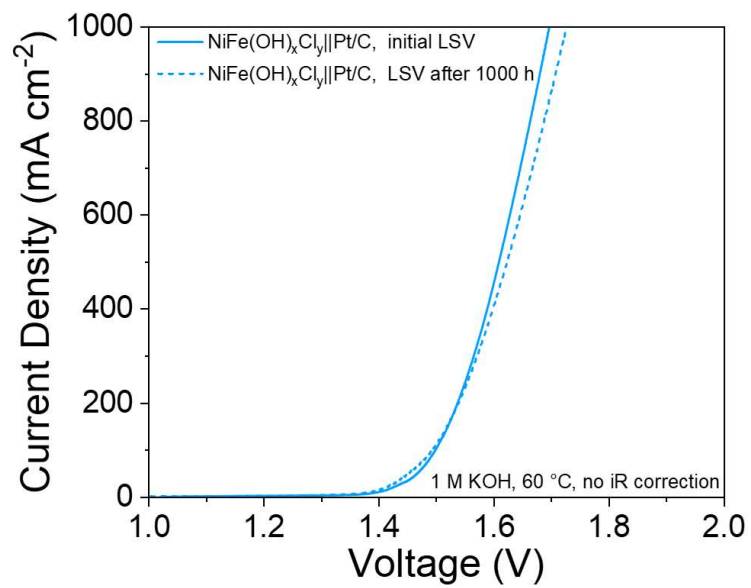

368

369 **Figure S40.** LSV curves of NiFe(OH)<sub>x</sub>Cl<sub>y</sub>||Pt/C at 60 °C before and after 1000 h i-t test

370 without iR compensation.

371 **Table S1.** EDS results of NiFe(OH)<sub>x</sub>Cl<sub>y</sub> and NiFeO<sub>x</sub>H<sub>y</sub> from SEM mapping.

372 NiFe(OH)<sub>x</sub>Cl<sub>y</sub>:

| Element | Line type       | Apparent concentration | k ratio | wt.%  |
|---------|-----------------|------------------------|---------|-------|
| C       | k linear system | 2.49                   | 0.02493 | 6.69  |
| O       | k linear system | 53.61                  | 0.18040 | 16.69 |
| Cl      | k linear system | 46.58                  | 0.40709 | 21.59 |
| Fe      | k linear system | 28.98                  | 0.28976 | 14.64 |
| Ni      | k linear system | 72.23                  | 0.72226 | 40.40 |

373

374 NiFeO<sub>x</sub>H<sub>y</sub>:

| Element | Line type       | Apparent concentration | k ratio | wt.%  |
|---------|-----------------|------------------------|---------|-------|
| C       | k linear system | 1.93                   | 0.01933 | 3.80  |
| O       | k linear system | 69.69                  | 0.27250 | 27.27 |
| Fe      | k linear system | 36.29                  | 0.36290 | 27.46 |
| Ni      | k linear system | 51.50                  | 0.51498 | 40.83 |

375

376 **Table S2.** XPS ratio of Ni<sup>2+</sup>/Ni<sup>3+</sup> and Fe<sup>2+</sup>/Fe<sup>3+</sup> for NiFe(OH)<sub>x</sub>Cl<sub>y</sub> and NiFeO<sub>x</sub>H<sub>y</sub>.

377 NiFe(OH)<sub>x</sub>Cl<sub>y</sub>:

| valence \ element | Ni 2p 3/2 | Ni 2p 1/2 | Fe 2p 3/2 | Fe 2p 1/2 |
|-------------------|-----------|-----------|-----------|-----------|
| +2                | 68.9%     | 69.0%     | 43.3%     | 43.1%     |
| +3                | 31.1%     | 31.0%     | 56.7%     | 56.9%     |

378

379 NiFeO<sub>x</sub>H<sub>y</sub>:

| valence \ element | Ni 2p 3/2 | Ni 2p 1/2 | Fe 2p 3/2 | Fe 2p 1/2 |
|-------------------|-----------|-----------|-----------|-----------|
| +2                | 66.6%     | 66.9%     | 48.5%     | 48.2%     |
| +3                | 33.4%     | 33.1%     | 51.5%     | 51.8%     |

380

381 **Table S3.** EXAFS fitting parameters at the Ni K-edge for various samples ( $S_0^2=0.82$   
382 from Ni-foil).

383 <sup>a</sup>CN: coordination numbers; <sup>b</sup>R: bond distance; <sup>c</sup> $\sigma^2$ : Debye-Waller factors; <sup>d</sup>  $\Delta E_0$ : the  
384 inner potential correction. R factor: goodness of fit. Error bounds that characterize the

|                                       | shell | CN <sup>a</sup> | R <sup>b</sup> (Å) | $\sigma^{2c}$ (Å <sup>2</sup> ) | $\Delta E_0^d$ (eV) | R factor |
|---------------------------------------|-------|-----------------|--------------------|---------------------------------|---------------------|----------|
| Ni-foil                               | Ni-Ni | 12              | 2.47±0.01          | 0.0062                          | 6.2±1.1             | 0.0049   |
| NiFe(OH) <sub>x</sub> Cl <sub>y</sub> | Ni-O  | 4.8±0.3         | 2.04±0.01          | 0.0088                          | -3.4±1.3            | 0.0112   |
|                                       | Ni-Cl | 1.6±0.2         | 2.41±0.01          | 0.0045                          |                     |          |
| NiFeO <sub>x</sub> H <sub>y</sub>     | Ni-O  | 5.1±0.3         | 2.04±0.01          | 0.0089                          | -2.6±1.0            | 0.0182   |
|                                       | Ni-Ni | 8.6±0.2         | 3.01±0.02          | 0.0091                          |                     |          |

385 structural parameters obtained by EXAFS spectroscopy were estimated as CN ± 20%;

386 R ± 1%;  $\sigma^2$  ± 20%.

387 **Table S4.** EXAFS fitting parameters at the Fe K-edge for various samples  $S_0^2=0.80$   
 388 from Fe-foil)

|                                       | shell  | CN <sup>a</sup> | R <sup>b</sup> (Å) | $\sigma^{2c}$ (Å <sup>2</sup> ) | $\Delta E_0^d$ (eV) | R factor |
|---------------------------------------|--------|-----------------|--------------------|---------------------------------|---------------------|----------|
| Fe-foil                               | Fe-Fe1 | 8               | 2.47±0.01          | 0.0045                          | 6.2±1.4             | 0.0032   |
|                                       | Fe-Fe2 | 6               | 2.85±0.01          | 0.0057                          |                     |          |
| NiFe(OH) <sub>x</sub> Cl <sub>y</sub> | Fe-O   | 3.4±0.2         | 1.97±0.01          | 0.0095                          | 2.3±1.1             | 0.0052   |
|                                       | Fe-Cl  | 1.0±0.2         | 2.48±0.01          | 0.0110                          |                     |          |
|                                       | Fe-Fe1 | 2.9±0.4         | 2.97±0.01          | 0.0120                          |                     |          |
|                                       | Fe-Fe2 | 4.6±0.7         | 3.45±0.01          | 0.0130                          |                     |          |
| NiFeO <sub>x</sub> H <sub>y</sub>     | Fe-O   | 4.2±0.2         | 1.94±0.01          | 0.0096                          | -4.3±1.2            | 0.0072   |
|                                       | Fe-Fe1 | 3.4±0.2         | 2.96±0.01          | 0.0110                          |                     |          |
|                                       | Fe-Fe2 | 7.2±0.3         | 3.45±0.01          | 0.0120                          |                     |          |

389 <sup>a</sup>CN: coordination numbers; <sup>b</sup>R: bond distance; <sup>c</sup> $\sigma^2$ : Debye-Waller factors; <sup>d</sup> $\Delta E_0$ : the  
 390 inner potential correction. R factor: goodness of fit. Error bounds that characterize the  
 391 structural parameters obtained by EXAFS spectroscopy were estimated as CN ± 20%;  
 392 R ± 1%;  $\sigma^2$  ± 20%.

393 **Table S5.** Elemental ratio of NiFe(OH)<sub>x</sub>Cl<sub>y</sub> synthesized with different constitutions of  
394 Ni salt.

| Ni salts constitution                                                      | elemental ratio (at.%) | Ni    | Fe    | O     | Cl           |
|----------------------------------------------------------------------------|------------------------|-------|-------|-------|--------------|
| 3.33 mmol NiCl <sub>2</sub>                                                |                        | 24.0% | 13.4% | 38.3% | <b>24.3%</b> |
| 1.665 mmol NiCl <sub>2</sub> +1.665 mmol Ni(NO <sub>3</sub> ) <sub>2</sub> |                        | 23.7% | 12.1% | 45.6% | <b>18.6%</b> |
| 0.833 mmol NiCl <sub>2</sub> +2.499 mmol Ni(NO <sub>3</sub> ) <sub>2</sub> |                        | 24.0% | 13.4% | 47.2% | <b>15.4%</b> |
| 3.33 mmol Ni(NO <sub>3</sub> ) <sub>2</sub>                                |                        | 26.2% | 13.6% | 47.9% | <b>12.3%</b> |

395

396 **Table S6.**  $C_{dl}$  and ECSA of  $NiFe(OH)_xCl_y@NF$ ,  $NiFeO_xH_y@NF$  and commercial  
397  $RuO_2@NF$  (Assuming the standard specific non-faradaic capacitance  $C_s=60 \mu F cm^{-2}$ ).

|                     | $C_{dl}$ (mF $cm^{-2}$ ) | ECSA ( $cm^2$ ) |
|---------------------|--------------------------|-----------------|
| $NiFe(OH)_xCl_y@NF$ | 0.974                    | 16.23           |
| $NiFeO_xH_y@NF$     | 0.488                    | 8.13            |
| $RuO_2@NF$          | 0.809                    | 13.48           |

398

399 **Table S7.** Comparison of OER performance among recently reported Ni/Fe-based  
 400 catalysts in alkaline media.

| Catalysts                                                 | Overpotential at 100 mA cm <sup>-2</sup> (mV) | Tafel slope (mV dec <sup>-1</sup> ) | Stability (hours@ current density) | Ref.                                              |
|-----------------------------------------------------------|-----------------------------------------------|-------------------------------------|------------------------------------|---------------------------------------------------|
| NiFe(OH) <sub>x</sub> Cl <sub>y</sub> @NF                 | 217                                           | 39.6                                | 3000 h@1 A cm <sup>-2</sup>        | <b>This work</b>                                  |
| NiFe-SQ/NF-R                                              | 225                                           | 50                                  | 700 h@3 A cm <sup>-2</sup>         | <i>Nat. Commun.</i> 2025, 16, 3407                |
| R-NiFeOOH@SO <sub>4</sub>                                 | 251                                           | 56                                  | 150 h@0.5 A cm <sup>-2</sup>       | <i>Nat. Commun.</i> 2024, 15, 8293                |
| CoNi-PI                                                   | 282                                           | 42                                  | 48 h@0.1 A cm <sup>-2</sup>        | <i>J. Am. Chem. Soc.</i> 2025, 147, 13928–13936   |
| V <sub>Cr,Co</sub> -NiFeOOH                               | 239                                           | 39.5                                | 500 h@0.5 A cm <sup>-2</sup>       | <i>J. Am. Chem. Soc.</i> 2025, 147, 3, 2607–2615  |
| NiCoFeCrMnS-HES                                           | 235                                           | 40.5                                | 100 h@0.1 A cm <sup>-2</sup>       | <i>Adv. Mater.</i> 2025, 2508610                  |
| NiFe(S)/NM                                                | 290                                           | 41.4                                | 500 h@0.3 A cm <sup>-2</sup>       | <i>Angew. Chem. Int. Ed.</i> 2025, 64, e202500303 |
| NiFe-LDH/Ni <sub>4</sub> Mo                               | 260                                           | 42                                  | 60 h@0.1 A cm <sup>-2</sup>        | <i>Angew. Chem. Int. Ed.</i> 2025, 64, e202413250 |
| Ni <sub>2</sub> Fe <sub>1</sub> Co <sub>0.75</sub>        | 350                                           | 48.9                                | 2 h@0.1 A cm <sup>-2</sup>         | <i>Adv. Energy Mater.</i> 2024, 2400029           |
| Ru-S-NiFe LDH                                             | 279                                           | 81.6                                | 100 h@0.25 A cm <sup>-2</sup>      | <i>Adv. Energy Mater.</i> 2025, 2500554           |
| NiFeS                                                     | 248                                           | 36.3                                | 100 h@0.35 A cm <sup>-2</sup>      | <i>Adv. Funct. Mater.</i> 2025, 2506656           |
| NFMN-FeOOH                                                | 295                                           | 40                                  | 300 h@0.5 A cm <sup>-2</sup>       | <i>Adv. Funct. Mater.</i> 2023, 2311854           |
| (NiFeCoMn) <sub>3</sub> S <sub>4</sub>                    | 410                                           | 75.6                                | 48 h@0.01 A cm <sup>-2</sup>       | <i>Adv. Funct. Mater.</i> 2023, 33, 2208170       |
| NC-CoNi <sub>2</sub> S <sub>4</sub> @ReS <sub>2</sub> /CC | 300                                           | 54.7                                | 60 h@0.1 A cm <sup>-2</sup>        | <i>Adv. Sci.</i> 2025, 12, 2413245                |
| NiFe-LDH-PTA                                              | 230                                           | 83.3                                | 500 h@1 A cm <sup>-2</sup>         | <i>ACS Catal.</i> 2025, 15, 8, 6486–6496          |
| H-FeCoS/NC-0.50                                           | 330                                           | 81.3                                | 30 h@0.01 A cm <sup>-2</sup>       | <i>Appl. Catal. B</i> 2024, 359, 124530           |

402 **Table S8.** Calculated Gibbs free energy variation of NiFe(OH)Cl and NiFeO<sub>x</sub>H<sub>y</sub> in  
 403 AEM pathway.

|                  | NiFe(OH) <sub>x</sub> Cl <sub>y</sub><br>(eV, U=0 V) | NiFe(OH) <sub>x</sub> Cl <sub>y</sub><br>(eV, U=1.23 V) | NiFeO <sub>x</sub> H <sub>y</sub><br>(eV, U=0 V) | NiFeO <sub>x</sub> H <sub>y</sub><br>(eV, U=1.23 V) |
|------------------|------------------------------------------------------|---------------------------------------------------------|--------------------------------------------------|-----------------------------------------------------|
| *                | 0                                                    | 0                                                       | 0                                                | 0                                                   |
| *OH              | 1.00951                                              | -0.13491                                                | 1.17103                                          | -0.05897                                            |
| *O               | 1.68916                                              | -0.77084                                                | 2.34441                                          | -0.11559                                            |
| *OOH             | 3.19612                                              | -0.49388                                                | 2.90893                                          | -0.78107                                            |
| *+O <sub>2</sub> | 4.92                                                 | 0                                                       | 4.92                                             | 0                                                   |

404

405 **Table S9.** Calculated Gibbs free energy variation of NiFe(OH)Cl and NiFeO<sub>x</sub>H<sub>y</sub> in  
 406 OPM pathway.

|                   | NiFe(OH) <sub>x</sub> Cl <sub>y</sub><br>(eV, U=0 V) | NiFe(OH) <sub>x</sub> Cl <sub>y</sub><br>(eV, U=1.23 V) | NiFeO <sub>x</sub> H <sub>y</sub><br>(eV, U=0 V) | NiFeO <sub>x</sub> H <sub>y</sub><br>(eV, U=1.23 V) |
|-------------------|------------------------------------------------------|---------------------------------------------------------|--------------------------------------------------|-----------------------------------------------------|
| **                | 0                                                    | 0                                                       | 0                                                | 0                                                   |
| *OH*              | 0.47995                                              | -0.75005                                                | 1.68489                                          | 0.45489                                             |
| *O*               | 2.34257                                              | -0.11743                                                | 3.39433                                          | 0.93433                                             |
| *O*OH             | 3.77497                                              | 0.08497                                                 | 5.2892                                           | 1.5992                                              |
| *OO*              | 4.60336                                              | -0.31664                                                | 6.77907                                          | 1.85907                                             |
| **+O <sub>2</sub> | 4.92                                                 | 0                                                       | 4.92                                             | 0                                                   |

407

408 **Table S10.** Comparison of AEMWE performance among reported Ni/Fe-based anodes  
 409 in alkaline media.

| AEMWE                                                                | Voltage                                                                 | Stability                         | Temperature | Ref.                                                           |
|----------------------------------------------------------------------|-------------------------------------------------------------------------|-----------------------------------|-------------|----------------------------------------------------------------|
| NiFe(OH) <sub>x</sub> Cl <sub>y</sub>   <br>Pt/C                     | <b>1.69 V@1 A<br/>cm<sup>-2</sup><br/>(without iR<br/>compensation)</b> | <b>1000 h@1 A cm<sup>-2</sup></b> | 60 °C       | <b>This work</b>                                               |
| PW <sub>12</sub> -CoFe<br>LDH  Pt/C                                  | 2.3 V@1 A cm <sup>-2</sup>                                              | 1000 h@1 A cm <sup>-2</sup>       | 60 °C       | <i>Nat. Commun.</i><br>2025, 16, 5541                          |
| NiFe-SQ/NF-R  <br>Pt/C                                               | 1.9 V@1 A cm <sup>-2</sup>                                              | 100 h@1 A cm <sup>-2</sup>        | 25 °C       | <i>Nat. Commun.</i><br>2025, 16, 3407                          |
| V <sub>Cr,Co</sub> -<br>NiFeOOH  Pt-<br>NiCoP                        | 1.76 V@1 A<br>cm <sup>-2</sup>                                          | 500 h@0.5 A cm <sup>-2</sup>      | 25 °C       | <i>J. Am. Chem. Soc.</i><br>2025, 147, 3,<br>2607–2615         |
| CFMO-2  Pt/C                                                         | 1.65 V@1 A<br>cm <sup>-2</sup>                                          | 100 h@1 A cm <sup>-2</sup>        | 80 °C       | <i>Angew. Chem. Int.</i><br><i>Ed.</i> 2025, 64,<br>e202416141 |
| NiFe(S)/NM  <br>MoNi <sub>4</sub>                                    | 1.74 V@1 A<br>cm <sup>-2</sup>                                          | 23 h@0.3 A cm <sup>-2</sup>       | 60 °C       | <i>Angew. Chem. Int.</i><br><i>Ed.</i> 2025, 64,<br>e202500303 |
| NiFe-<br>LDH/Ni <sub>4</sub> Mo  <br>NiFe-<br>LDH/Ni <sub>4</sub> Mo | 1.76 V@0.3 A<br>cm <sup>-2</sup>                                        | 150 h@0.1 A cm <sup>-2</sup>      | 25 °C       | <i>Angew. Chem. Int.</i><br><i>Ed.</i> 2025, 64,<br>e202413250 |
| Ru-S-NiFe<br>LDH  Pt/C                                               | 1.92 V@1 A<br>cm <sup>-2</sup>                                          | 80 h@1 A cm <sup>-2</sup>         | 55 °C       | <i>Adv. Energy</i><br><i>Mater.</i> 2025,<br>2500554           |
| NiFeS  Pt/C                                                          | 1.78 V@1 A<br>cm <sup>-2</sup>                                          | 300 h@1 A cm <sup>-2</sup>        | 60 °C       | <i>Adv. Funct.</i><br><i>Mater.</i> 2025,<br>2506656           |
| NFMN-FeOOH  <br>NFMN-Ni <sub>2</sub> P                               | 1.81 V@0.5 A<br>cm <sup>-2</sup>                                        | 150 h@0.5 A cm <sup>-2</sup>      | 25 °C       | <i>Adv. Funct.</i><br><i>Mater.</i> 2023,<br>2311854           |
| NiFe-LDH-PTA                                                         | 1.93 V@1 A<br>cm <sup>-2</sup>                                          | 170 h@1 A cm <sup>-2</sup>        | 60 °C       | <i>ACS Catal.</i> 2025,<br>15, 8, 6486–6496                    |

410

## 411 Reference

412 [1] K. Heusler, S. Trasatti, J. Justice, **Pure and Appl. Chem.** 1986, 58, 955-966.
